# Supplementary material
Source: PubMed Central journal article supplement (PMC6746313)
Supplement: NIHMS1046485-supplement-Supplemental.pdf [file NIHMS1046485-supplement-Supplemental.pdf]

# THE LANCET Infectious Diseases

## Supplementary webappendix

This webappendix formed part of the original submission and has been peer reviewed.  
We post it as supplied by the authors.

Supplement to: Adenis AA, Valdes A, Cropet C, et al. Burden of HIV-associated histoplasmosis compared with tuberculosis in Latin America: a modelling study. *Lancet Infect Dis* 2018; published online August 23. [http://dx.doi.org/10.1016/S1473-3099\(18\)30354-2](http://dx.doi.org/10.1016/S1473-3099(18)30354-2).

## Appendix

### Summary in Spanish

**Título : La Carga de la histoplasmosis asociada al VIH en América Latina y su comparación con la carga de la tuberculosis: resultados de un estudio de modelación.**

#### **Antecedentes :**

Las infecciones fúngicas siguen siendo un importante contribuyente de las infecciones oportunistas que afectan a las personas que viven con el VIH (PLVIH). Entre ellas, la histoplasmosis se considera una enfermedad desatendida, la cual a menudo se diagnostica erróneamente como tuberculosis (TB) y es responsable de numerosas muertes en América Latina. El objetivo de este estudio fue estimar la carga de la histoplasmosis asociada al VIH en países de América Latina y compararla con la carga tuberculosis.

#### **Métodos :**

Para este estudio de modelación, nosotros estimamos la prevalencia de exposición a *Histoplasma capsulatum*, la incidencia anual de casos de histoplasmosis asociada a PLHIV y el número de muertes para el año 2012 en países de América Latina, esto basado en estudios históricos de reactividad cutánea a la histoplasmina en población general, utilizando una dilución de antígeno mayor a 1/10. Los estudios fueron identificados mediante búsqueda bibliográfica. Los datos sobre la tuberculosis asociada al VIH se extrajeron de los informes de la OMS, y la información sobre desenlaces de las personas con VIH se extrajeron del informe de ONUSIDA correspondiente al año 2012. Nosotros incluimos sistemáticamente cálculos de incertidumbre en cada uno de los pasos en el proceso de estimación.

#### **Resultados :**

De 1310 artículos identificados al 1 de junio del año 2015, fueron incluidos 24 artículos en este estudio, los cuales representaron 129 estudios de reactividad cutánea a la histoplasmina realizados en población general de países de América Latina. Para el año 2012, estimamos un rango de 6710 (95% IC: [5680-7867])-15657 [13254-18357] casos sintomáticos de histoplasmosis asociada a PLHIV en América Latina. Las áreas críticas para la prevalencia de histoplasmosis (>30%) e incidencia (>1,5 casos por 100 PLHIV) fueron: América Central, el norte de América del Sur y Argentina. Acuerdo a los escenarios más realistas, estimamos un rango de 671 [568-787]-9394 [7952-11014] muertes relacionadas con la histoplasmosis, en comparación con las 5062 [3777-6405] muertes asociadas con la tuberculosis, en América Latina.

#### **Interpretación :**

Nuestras estimaciones de incidencia de histoplasmosis y muertes asociadas son altas y consistentes con los datos publicados. Por primera vez se estimó que la carga de la histoplasmosis es equivalente en incidencia e incluso mayor en muertes cuando fue comparada con la carga de la tuberculosis en PLHIV de América Latina.

**Fondos :** Ninguno

## **Supplementary text**

### **Methods**

#### **Literature review**

Audrey Valdes and Antoine Adenis performed the literature review and selection of articles.

The search terms were « histoplasmin » or « histoplasmosis prevalence » associated with « South America », « Central America », « Latin America » or any country name among the following: Argentina, Belize, Bolivia, Brazil, Chile, Colombia, Costa Rica, Ecuador, French Guiana, Guatemala, Guyana, Honduras, Mexico, Nicaragua, Panama, Peru, Paraguay, El Salvador, Suriname, Uruguay and Venezuela. All types of published articles in any language were considered without time limitations since we assumed that, in endemic areas, the prevalence of this environmental fungal pathogen remained stable over time.

We abstracted the following data from each article and included a study when all were present: name of the country and region (part of Central or South America), absolute number of persons tested and number of persons with a positive histoplasmin skin test, dilution level of histoplasmin antigen used for skin testing  $>1/10$  to avoid false positives due to cross-reactivity (range of dilution kept between  $1/100$  and  $1/1,000$ ) and population tested. We included only studies that involved the general population and not a specific subgroup. However, when the only study from a given country involved a specific population subgroup, we included it to compute country's estimates.

Among 1,310 articles identified as of June 1, 2015, 174 articles were considered eligible for the study based on abstracts. On review of full articles, only 77 were considered eligible based on the availability of information required to calculate histoplasmosis prevalence. At the end of the selection process, 24 articles were included for the study (Technical Appendix 1); 31 records were excluded because they did not meet the inclusion criteria and another 22 records were excluded because information was already available elsewhere in atlases or reviews.

## Statistical analysis

### Histoplasmosis data and calculation of estimates

#### *Prevalence of previous exposure to Histoplasma capsulatum in the general population*

For Guatemala, Guyana and Suriname, prevalence of histoplasmin skin test positivity was estimated using data from studies performed on hospitalized patients of varying ages. Similarly, for Chile, studies performed on children and students were used to estimate prevalence of histoplasmin skin test positivity. Costa Rica, Nicaragua and El Salvador had no general population estimations available, so histoplasmin skin test prevalence was approximated using the mean of the bordering countries' estimates based on the similarity of environmental conditions and a related assumption that the geographical distribution of histoplasmosis prevalence should be similar as well. Estimates of the lower and higher bounds for Costa Rica, Nicaragua and El Salvador corresponded to the lowest and highest bounds of the bordering countries' estimates.

#### *Histoplasmosis incidence in PLHIV*

##### *General assumptions*

Because incidence data are scarce, we used the following assumptions to estimate histoplasmosis incidence. First, an estimated disease duration was calculated using the prevalence population relation  $P_p = \frac{I_d E_i(D)}{1 + I_d E_i(D)}$  where  $P_p$  denotes the prevalence,  $I_d$  incidence density, and  $E_i(D)$  expected value of duration of histoplasmosis obtained from an incidence (i) case series. It was assumed that the duration of histoplasmosis was constant and that the population was in a steady-state (Freeman J & al., *Am J Epidemiol.*, 1980). Secondly, for incidence densities ( $I_d$ ) smaller than 0.10, cumulative incidence ( $I_c$ ) is a good approximation of the incidence density. As an example, for  $I_d=0.1$ , using the relation  $I_c = 1 - e^{-I_d}$ ,  $I_c=0.095$ , which for practical purposes could be rounded to 0.1. This allowed us to proceed with further computations to estimate the burden of histoplasmosis.

To our knowledge, only two published histoplasmosis incidence calculations are based on prospective PLHIV cohorts (Nacher M & al., *Am J Trop Med Hyg.*, 2011) (McKinsey DS & al., *Clin Infect Dis.*, 1997). In the French Guiana PLHIV cohort, the duration of histoplasmosis was estimated at 0.321 years, considering an annual histoplasmosis incidence density of 1.5 per 100 HIV-infected person-years and a histoplasmosis prevalence in the general population of 32.5% (Nacher M & al., *Am J Trop Med Hyg.*, 2011) (Floch H., *Mycopathologia et mycologia applicata*, 1957). This meant that, on average, duration of histoplasmosis was estimated at 3.9 months ( $12 \times 0.321$ ). This estimate was used in the overall model, as it is the only one available for Latin America and concordant with an estimate of 0.395 years calculated in a North American PLHIV cohort (McKinsey DS & al., *Clin Infect Dis.*, 1997).

In order to perform calculations in the population subgroup represented by PLHIV, we assumed that histoplasmosis prevalence in PLHIV was similar to estimates obtained from histoplasmin skin test prevalence studies performed in the general population.

Moreover, accuracy in histoplasmosis incident cases estimates among PLHIV required taking into account that histoplasmosis is mainly an asymptomatic and spontaneously self-limited infection in immunocompetent people and is classically reported to be primarily symptomatic and fatal without appropriate antifungal therapy in PLHIV with a CD4 count  $<200/\text{mm}^3$  (Adenis AA & al., *Curr. Trop. Med. Reports*, 2014). As no estimates were available for the number of PLHIV with a CD4 count  $<200/\text{mm}^3$  in Latin America, we therefore approximated the annual number of incident HIV-associated histoplasmosis symptomatic cases. Several studies based on cohort data have reported that a large proportion of PLHIV starting antiretroviral therapy (ART) with a CD4 count  $<200/\text{mm}^3$ , ranging from 30% (observed in European settings like in French Guiana) to 70% in countries across Latin America (Crabtree-Ramírez B & al., *PLoS ONE*, 2011) (Bonjour MA & al., *AIDS Research and Therapy*, 2008) (Piñeirúa A & al., *The Lancet Infectious Diseases*, 2015) (Vidal JE & al., *The Brazilian Journal of Infectious Diseases*, 2013) (García JI & aj., *AIDS Research and Treatment*, 2015). Patients included in these studies were diagnosed with advanced HIV disease (i.e. CD4 count  $<200/\text{mm}^3$  or

with a history of an AIDS-defining illness), due to late testing or late presentation and subsequently late ART initiation.

#### **Tuberculosis data and calculation of estimates**

For French Guiana, we used the published estimate of the number of TB-related deaths among PLHIV (Nacher M, *COREVIH Guyane*, 2013). The number of incident TB cases was estimated from the published incidence density of 0.77 per 100 HIV-infected patients-year (95% CI: 0.45-1.09) according to estimates of the number of PLHIV (Nacher M & al., *Am J Trop Med Hyg.*, 2011). The two latter parameters were modeled in the same way as histoplasmosis incidence density in order to express an expected TB incidence number along with a 95% CI.

#### **HIV data and calculation of estimates:**

For Brazil, the estimated number of PLHIV was calculated as the mean of the low and high UNAIDS estimates in Brazil. For French Guiana, as the number of PLHIV (all ages) was not available, we assumed a scenario based on a heterosexual HIV transmission and approximate prevalence with the published prevalence of 1.2% in pregnant women for the year 2012 (Nacher M, *COREVIH Guyane*, 2013). As HIV prevalence is quite stable over time, low and high values for HIV prevalence were set at 0.8% and 1.4%, respectively (Adenis A & al., *PLoS Negl Trop Dis.*, 2014). The estimated number of PLHIV (all ages) in French Guiana, lower and upper estimates, were calculated according to the last census reporting 241,922 inhabitants in 2013 (Décret n° 2014-1611, Journal Officiel de la République Française, 2014).

## Results

**Table 3: Annual number of deaths estimated for symptomatic histoplasmosis cases and reported for tuberculosis cases in people living with HIV, Latin America, 2012**

|                      | Histoplasmosis-related deaths<br>annual incidence in PLHIV* |                     |                     | Tuberculosis-related deaths <sup>†</sup><br>annual incidence in PLHIV <sup>†</sup> |
|----------------------|-------------------------------------------------------------|---------------------|---------------------|------------------------------------------------------------------------------------|
|                      | 10% case-fatality (F[10])                                   |                     |                     | N<br>[Low-High]                                                                    |
|                      | N[30]<br>[95%CI]                                            | N[50]<br>[95%CI]    | N[70]<br>[95%CI]    |                                                                                    |
| Argentina            | 56<br>[46-67]                                               | 93<br>[77-112]      | 130<br>[108-156]    | 52<br>[16-110]                                                                     |
| Belize               | 3<br>[2-4]                                                  | 5<br>[3-6]          | 7<br>[5-9]          | 3<br>[2-4]                                                                         |
| Bolivia              | 4<br>[3-6]                                                  | 7<br>[5-10]         | 10<br>[7-13]        | 140<br>[100-170]                                                                   |
| Brazil               | 141<br>[130-154]                                            | 236<br>[216-256]    | 330<br>[302-358]    | 2200<br>[1500-2800]                                                                |
| Chile                | 0.04<br>[0.01-0.07]                                         | 0.06<br>[0.02-0.12] | 0.09<br>[0.02-0.17] | 8<br>[4-14]                                                                        |
| Colombia             | 47<br>[38-56]                                               | 78<br>[63-93]       | 110<br>[89-131]     | 310<br>[230-400]                                                                   |
| Costa Rica           | 5<br>[5-6]                                                  | 9<br>[8-10]         | 12<br>[11-14]       | 10<br>[8-13]                                                                       |
| Ecuador              | 15<br>[10-23]                                               | 25<br>[17-38]       | 36<br>[24-53]       | 390<br>[320-460]                                                                   |
| El Salvador          | 20<br>[11-35]                                               | 33<br>[19-58]       | 46<br>[27-82]       | 29<br>[20-39]                                                                      |
| French Guiana        | 1<br>[1-2]                                                  | 2<br>[2-3]          | 3<br>[2-4]          | 1<br>[NA-NA]                                                                       |
| Guatemala            | 80<br>[50-130]                                              | 134<br>[83-216]     | 187<br>[117-303]    | 410<br>[340-480]                                                                   |
| Guyana               | 6<br>[3-11]                                                 | 10<br>[6-18]        | 14<br>[8-25]        | 33<br>[21-48]                                                                      |
| Honduras             | 16<br>[13-18]                                               | 26<br>[22-30]       | 36<br>[31-43]       | 110<br>[76-150]                                                                    |
| Mexico               | 48<br>[42-55]                                               | 79<br>[71-91]       | 111<br>[99-127]     | 430<br>[330-540]                                                                   |
| Nicaragua            | 5<br>[4-7]                                                  | 9<br>[7-12]         | 13<br>[9-17]        | 17<br>[13-22]                                                                      |
| Panama               | 9<br>[7-10]                                                 | 14<br>[11-17]       | 20<br>[16-24]       | 47<br>[35-61]                                                                      |
| Paraguay             | 3<br>[2-4]                                                  | 5<br>[3-7]          | 6<br>[4-9]          | 57<br>[46-69]                                                                      |
| Peru                 | 21<br>[10-39]                                               | 35<br>[17-65]       | 48<br>[23-91]       | 450<br>[340-570]                                                                   |
| Suriname             | 3<br>[3-3]                                                  | 5<br>[4-5]          | 7<br>[6-7]          | 15<br>[11-19]                                                                      |
| Uruguay              | 1<br>[1-2]                                                  | 2<br>[2-3]          | 3<br>[3-4]          | 20<br>[15-26]                                                                      |
| Venezuela            | 97<br>[73-125]                                              | 162<br>[121-209]    | 227<br>[170-292]    | 330<br>[250-410]                                                                   |
| <b>Total</b>         | <b>671</b>                                                  | <b>1118</b>         | <b>1566</b>         | <b>5062</b>                                                                        |
| <b>Latin America</b> | <b>[568-787]</b>                                            | <b>[947-1311]</b>   | <b>[1325-1836]</b>  | <b>[3777-6205]</b>                                                                 |

PLHIV: People living with HIV; 95% CI: 95% Monte Carlo confidence interval

\* One case-fatality rate scenario (F[10]) corresponding to 10% case-fatality rate) was combined with three scenarios of the estimated number of symptomatic HIV-associated histoplasmosis cases (N[30], N[50], N[70] corresponding to 30%, 50%, 70% of the estimated annual number of HIV-associated histoplasmosis cases, symptomatic and asymptomatic, having a CD4 count <200/mm<sup>3</sup>). All data were estimated for the year 2012. The median [2.5<sup>th</sup> and 97.5<sup>th</sup> percentiles] were presented for each estimates.

<sup>†</sup> Tuberculosis-related deaths were extracted from the World Health Organization outcomes tables of the year 2012. For French Guiana, information was given by the Public Health Surveillance authorities.

**Figure 4: Comparison of the number of incident cases (a.) and the number of deaths (b.) estimated for symptomatic histoplasmosis and reported for tuberculosis in people living with HIV, Latin America, 2012.**

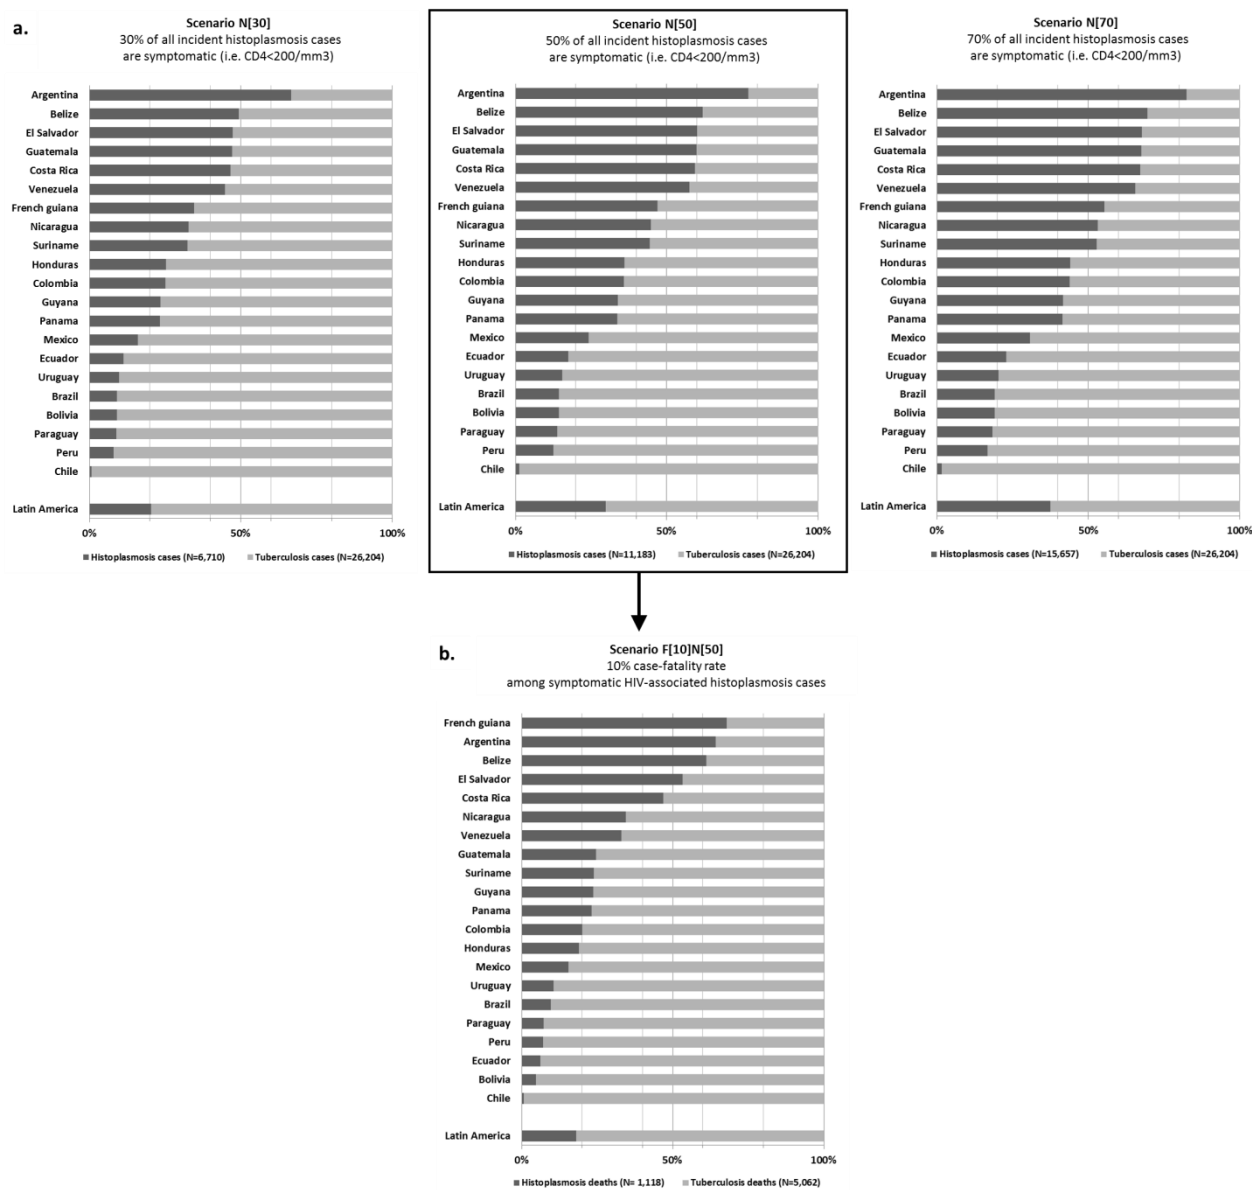

a. The x axis represented the ratio (%) of the estimated number of cases associated with symptomatic histoplasmosis cases among the number of reported tuberculosis cases combined with the estimated number of symptomatic histoplasmosis cases according to three scenarios of 30% (N[30]), 50% (N[50]) and 70% (N[70]) of the estimated annual number of histoplasmosis cases (asymptomatic and symptomatic) occurring in people living with HIV and having a CD4 count <200/mm<sup>3</sup>.

b. The x-axis represented the ratio (%) of the estimated number of deaths associated with symptomatic histoplasmosis cases among the number of AIDS-related tuberculosis deaths combined with the estimated number of histoplasmosis-related deaths in people living with HIV.

HIV-associated tuberculosis cases (a.) and deaths (b.) were extracted for all countries from the WHO notifications and outcomes tables of the year 2012.



## **Supplementary references**

### **Introduction**

Peigne V, Dromer F, Elie C, Lidove O, Lortholary O. Imported acquired immunodeficiency syndrome-related histoplasmosis in metropolitan France: a comparison of pre-highly active anti-retroviral therapy and highly active anti-retroviral therapy eras. *Am J Trop Med Hyg.* 2011;85(5):934-41

Homei A, Worboys M. Fungal Disease in Britain and the United States 1850-2000 *Mycoses and Modernity.* 2013/11/15 ed. Centre for the History of Science TaM, University of Manchester, England (<http://chstm.manchester.ac.uk>), editor. Manchester, England: Palgrave Macmillan; 2013. 225 p

Nacher M, Adenis A, Mc Donald S, Do Socorro Mendonca Gomes M, Singh S, Lopes Lima I, et al. Disseminated Histoplasmosis in HIV-Infected Patients in South America: A Neglected Killer Continues on Its Rampage. *PLoS Negl Trop Dis.* 2013;7(11):e2319

Del Granado M, Lopez R, Volz A, Marx F, Mujica O, Munaico C, et al. Tuberculosis in the Americas - Regional Report 2014 - Epidemiology, Control, and Financing. PAHO/WHO, 2015

### **Methods**

#### **Literature review**

The United Nations Geoscheme definitions 2015 [Date accessed: 06/01/2015]. Available from: <https://unstats.un.org/unsd/methodology/m49/>

### **Histoplasmosis incidence in PLHIV**

#### *General assumptions*

Freeman J, Hutchison GB. Prevalence, incidence and duration. *Am J Epidemiol.* 1980;112(5):707-23

Nacher M, Adenis A, Adriouch L, Dufour J, Papot E, Hanf M, et al. What is AIDS in the Amazon and the Guianas? Establishing the burden of disseminated histoplasmosis. *Am J Trop Med Hyg.* 2011;84(2):239-40

McKinsey DS, Spiegel RA, Hutwagner L, Stanford J, Driks MR, Brewer J, et al. Prospective study of histoplasmosis in patients infected with human immunodeficiency virus: incidence, risk factors, and pathophysiology. *Clin Infect Dis.* 1997;24(6):1195-203

Floch H. Revue critique des investigations et de la littérature mycologiques pour les années 1946–1956 en Guyane Française. *Mycopathologia et mycologia applicata.* 1957;8(3):194-205

Adenis AA, Aznar C, Couppie P. Histoplasmosis in HIV-Infected Patients: A Review of New Developments and Remaining Gaps. *Current tropical medicine reports.* 2014;1:119-28

Crabtree-Ramírez B, Caro-Vega Y, Shepherd BE, Wehbe F, Cesar C, Cortés C, et al. Cross-Sectional Analysis of Late HAART Initiation in Latin America and the Caribbean: Late Testers and Late Presenters. *PLoS ONE*. 2011;6(5):e20272

Bonjour MA, Montagne M, Zambrano M, Molina G, Lippuner C, Wadskier FG, et al. Determinants of late disease-stage presentation at diagnosis of HIV infection in Venezuela: A case-case comparison. *AIDS Research and Therapy*. 2008;5(1):1-12

Piñeirúa A, Sierra-Madero J, Cahn P, Guevara Palmero RN, Martínez Buitrago E, Young B, et al. The HIV care continuum in Latin America: challenges and opportunities. *The Lancet Infectious Diseases*. 2015;15(7):833-9

Vidal JE, Penalva de Oliveira AC, Dauar RF, Boulware DR. Strategies to reduce mortality and morbidity due to AIDS-related cryptococcal meningitis in Latin America. *The Brazilian Journal of Infectious Diseases*. 2013;17(3):353-62

García JI, Samayoa B, Sabidó M, Prieto LA, Nikiforov M, Pinzón R, et al. The MANGUA Project: A Population-Based HIV Cohort in Guatemala. *AIDS Research and Treatment*. 2015;2015:372816

#### **Tuberculosis data and calculation of estimates**

Tuberculosis and HIV notifications and outcomes tables [Internet]. 2013 [Date accessed: 06/01/2015]. Available from: <http://apps.who.int/gho/data/view.main.TBHIVWHOREG>

Nacher M. Rapport d'activités 2012 COREVIH Guyane. Cayenne: COREVIH, 2013

Nacher M, Adenis A, Adriouch L, Dufour J, Papot E, Hanf M, et al. What is AIDS in the Amazon and the Guianas? Establishing the burden of disseminated histoplasmosis. *Am J Trop Med Hyg*. 2011;84(2):239-40

#### **HIV data and calculation of estimates:**

Nacher M. Rapport d'activités 2012 COREVIH Guyane. Cayenne: COREVIH, 2013

Adenis A, Nacher M, Hanf M, Vantilcke V, Boukhari R, Blachet D, et al. HIV-associated histoplasmosis early mortality and incidence trends: from neglect to priority. *PLoS Negl Trop Dis*. 2014;8(8):e3100

Journal-Officiel-de-la-République-Française. Décret n° 2014-1611 du 24 décembre 2014 authentifiant les chiffres des populations de métropole, des départements d'outre-mer de la Guadeloupe, de la Guyane, de la Martinique et de La Réunion, de Saint-Barthélemy, de Saint-Martin et de Saint-Pierre-et-Miquelon. Paris 2014

**Supplementary statistics**

**Conceptual overview of the modeling process**

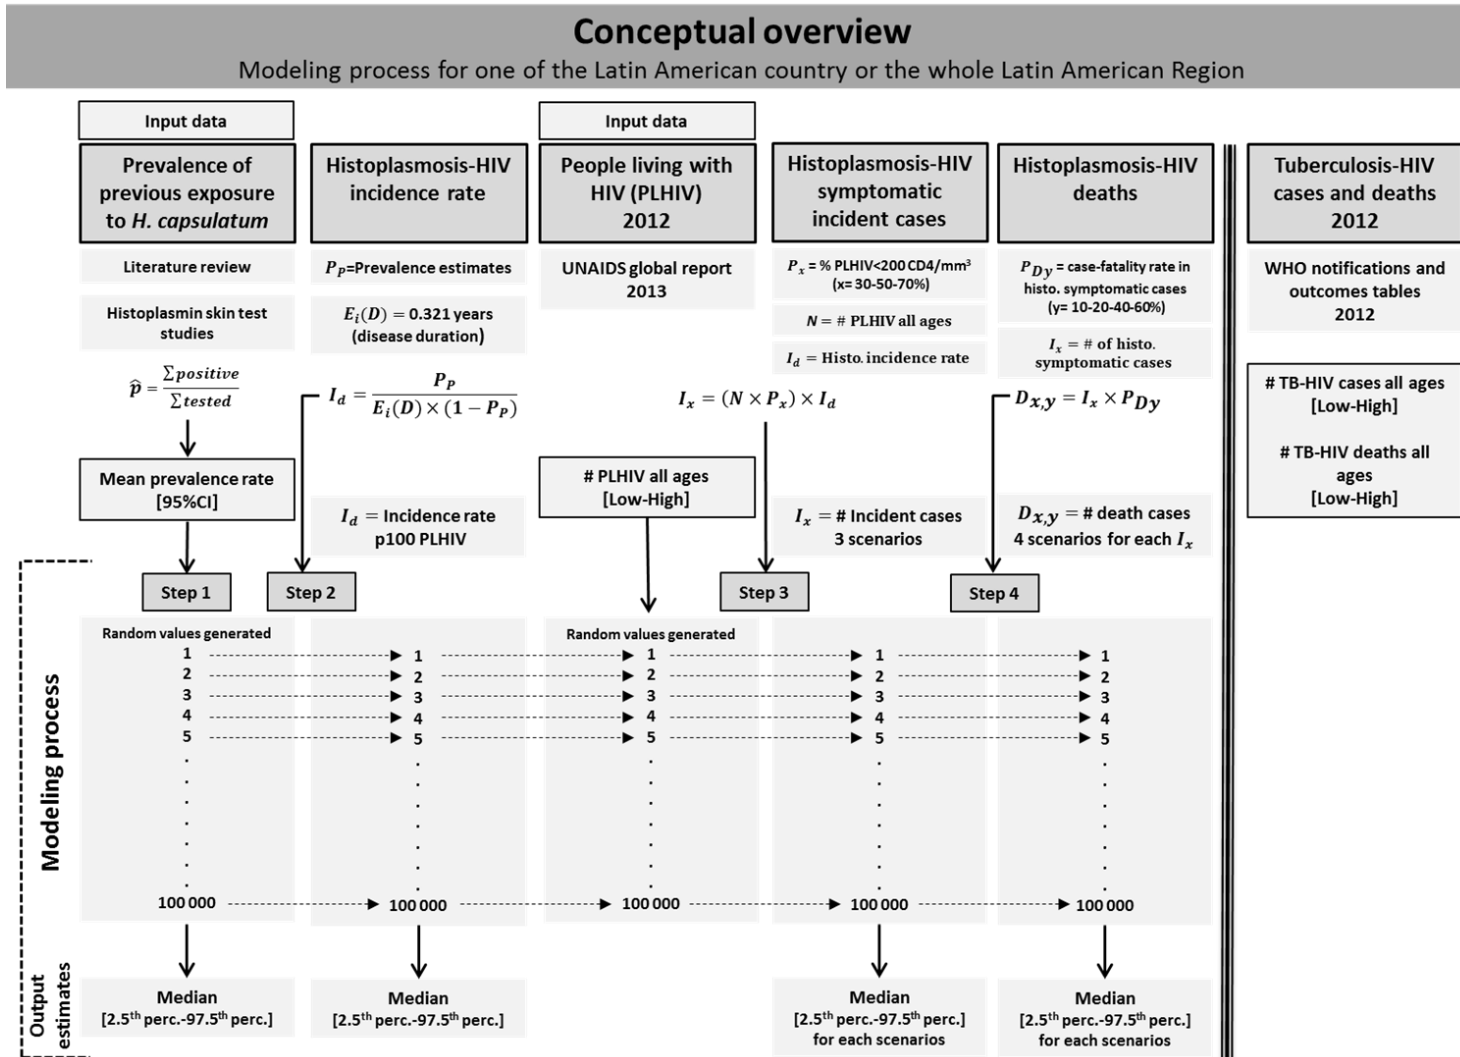

Literature review results

| Countries | Region  | Study Year | People tested (n) | Positive skin test prevalence (%) | Histoplasmin antigen dilution | Population explored | References                                                                                                                                                                                                                                                                 | References # |
|-----------|---------|------------|-------------------|-----------------------------------|-------------------------------|---------------------|----------------------------------------------------------------------------------------------------------------------------------------------------------------------------------------------------------------------------------------------------------------------------|--------------|
| Argentina | Tucuman | 1992       | 224               | 53,6                              | 1/100                         | General             | van Gelderen de Komaid A, Duán EL, Madero AM, Carizo V. Histoplasmosis in northwestern Argentina. Epidemiological survey of Chuscha and La Higuera in the province of Tucumán. Eur J Epidemiol. mars 1992;8(2):206-10.                                                     | 1            |
| Argentina | Tucuman | 1995       | 229               | 27,3                              | 1/100                         | General             | van Gelderen de Komaid A, Durán EL. Histoplasmosis in northwestern Argentina. II: Prevalence of Histoplasmosis capsulati and paracoccidioidomycosis in the population south of Chuscha, Gonzalo and Potrero in the province of Tucuman. Mycopathologia. 1995;129(1):17-23. | 2            |
| Argentina | Tucuman | 1999       | 287               | 33,8                              | 1/100                         | General             | van Gelderen de Komaid A, Durán E, Borges de Kestelman I. Histoplasmosis and Paracoccidioidomycosis in northwestern Argentina III. Epidemiological survey in Vipos, La Toma, and Choromoro - Trancas, Tucumán, Argentina. Eur J Epidemiol. avr 1999;15(4):383-8.           | 3            |
| Belize    | Corozal | 1978       | 79                | 49,4                              | 1/100                         | General             | Quinones F, Koplan JP, Pike L, Staine F, Ajello L. Histoplasmosis in Belize, Central America. Am J Trop Med Hyg. mai 1978;27(3):558-61.                                                                                                                                    | 4            |

|         |            |      |     |      |       |         |                                                                                                                                                                                                                    |   |
|---------|------------|------|-----|------|-------|---------|--------------------------------------------------------------------------------------------------------------------------------------------------------------------------------------------------------------------|---|
| Bolivia | Beni       | 1967 | 805 | 51,5 | 1/100 | General | Omran, A. R., McEwen, W. J., and Zaki, M. H., 1967. Epidemiological studies in Bolivia. Final epidemiological report for the Peace Corps. RISM Bolivia Project, Research Institute for the Study of Man, pp. 37-99 | 5 |
| Bolivia | Chuquisaca | 1967 | 249 | 5    | 1/100 | General | Omran, A. R., McEwen, W. J., and Zaki, M. H., 1967. Epidemiological studies in Bolivia. Final epidemiological report for the Peace Corps. RISM Bolivia Project, Research Institute for the Study of Man, pp. 37-99 | 5 |
| Bolivia | La Paz     | 1964 | 110 | 9,9  | 1/100 | General | Edwards PQ, Billings EL. Worldwide pattern of skin sensitivity to histoplasmin. Am J Trop Med Hyg. mar 1971;20(2):288-319                                                                                          | 6 |
| Bolivia | La Paz     | 1967 | 807 | 13,6 | 1/100 | General | Omran, A. R., McEwen, W. J., and Zaki, M. H., 1967. Epidemiological studies in Bolivia. Final epidemiological report for the Peace Corps. RISM Bolivia Project, Research Institute for the Study of Man, pp. 37-99 | 5 |
| Bolivia | La Paz     | 1967 | 537 | 0,8  | 1/100 | General | Omran, A. R., McEwen, W. J., and Zaki, M. H., 1967. Epidemiological studies in Bolivia. Final epidemiological report for the Peace Corps. RISM Bolivia Project, Research Institute for the Study of Man, pp. 37-99 | 5 |
| Bolivia | Oruro      | 1967 | 52  | 5,8  | 1/100 | General | Omran, A. R., McEwen, W. J., and Zaki, M. H., 1967. Epidemiological studies in Bolivia. Final epidemiological                                                                                                      | 5 |

|         |            |      |     |      |               |         |                                                                                                                                                               |   |
|---------|------------|------|-----|------|---------------|---------|---------------------------------------------------------------------------------------------------------------------------------------------------------------|---|
|         |            |      |     |      |               |         | report for the Peace Corps. RISM Boliva Project, Research Institute for the Study of Man, pp. 37-99                                                           |   |
| Bolivia | Santa cruz | 1964 | 207 | 26,1 | 1/100         | General | Edwards PQ, Billings EL. Worldwide pattern of skin sensitivity to histoplasmin. Am J Trop Med Hyg. mar 1971;20(2):288-319                                     | 6 |
| Brazil  | Alagoas    | 1990 | 107 | 14   | 1/1000        | General | Santos MC, Pedrosa CM. Epidemiologic survey with histoplasmin and paracoccidioidine in Arapiraca-Alagoas. Rev Soc Bras Med Trop. déc 1990;23(4):213-5         | 7 |
| Brazil  | Amapa      | 1976 | 109 | 42,2 | 1/1000        | General | Fava S di C, Netto CF. Epidemiologic surveys of histoplasmin and paracoccidioidin sensitivity in Brazil. Rev Inst Med Trop Sao Paulo. juin 1998;40(3):155-64. | 8 |
| Brazil  | Amazonas   | 1973 | 294 | 40,8 | 1/100 & 1/500 | General | Fava S di C, Netto CF. Epidemiologic surveys of histoplasmin and paracoccidioidin sensitivity in Brazil. Rev Inst Med Trop Sao Paulo. juin 1998;40(3):155-64. | 8 |
| Brazil  | Amazonas   | 1978 | 495 | 50,1 | 1/1000        | General | Mok WY, Netto CF. Paracoccidioidin and histoplasmin sensitivity in Coari (state of Amazonas), Brazil. Am J Trop Med Hyg. juill 1978;27(4):808-14              | 9 |
| Brazil  | Amazonas   | 1986 | 623 | 18,8 | 1/1000        | General | Fava S di C, Netto CF. Epidemiologic surveys of histoplasmin and paracoccidioidin sensitivity in Brazil. Rev Inst Med Trop Sao Paulo. juin 1998;40(3):155-64. | 8 |
| Brazil  | Bahía      | 1949 | 119 | 9,2  | 1/100         | General | Edwards PQ, Billings EL. Worldwide pattern of skin sensitivity to histoplasmin. Am J Trop Med Hyg. mar                                                        | 6 |

|        |                  |      |     |       |        |         |                                                                                                                                                                                                                                                                   |    |
|--------|------------------|------|-----|-------|--------|---------|-------------------------------------------------------------------------------------------------------------------------------------------------------------------------------------------------------------------------------------------------------------------|----|
|        |                  |      |     |       |        |         | 1971;20(2):288-319                                                                                                                                                                                                                                                |    |
| Brazil | Bahía            | 1950 | 557 | 21,9  | 1/100  | General | Fava S di C, Netto CF. Epidemiologic surveys of histoplasmin and paracoccidioidin sensitivity in Brazil. Rev Inst Med Trop Sao Paulo. juin 1998;40(3):155-64.                                                                                                     | 8  |
| Brazil | Bahía            | 1950 | 230 | 2,6   | 1/1000 | General | Fava S di C, Netto CF. Epidemiologic surveys of histoplasmin and paracoccidioidin sensitivity in Brazil. Rev Inst Med Trop Sao Paulo. juin 1998;40(3):155-64.                                                                                                     | 8  |
| Brazil | Bahía            | 1950 | 108 | 25,2  | 1/100  | General | Edwards PQ, Billings EL. Worldwide pattern of skin sensitivity to histoplasmin. Am J Trop Med Hyg. mar 1971;20(2):288-319                                                                                                                                         | 6  |
| Brazil | Ceara            | 1990 | 138 | 61,5  | 1/1000 | General | Diógenes MJN, Gonçalves HMG, Mapurunga ACP, Alencar KF, Andrade FB, Nogueira-Queiroz JA. Reações à histoplasmina e paracoccidioidina na Serra de Pereiro (estado do Ceará-Brasil). Revista do Instituto de Medicina Tropical de São Paulo. avr 1990;32(2):116-20. | 10 |
| Brazil | Federal district | 1972 | 826 | 22,37 | 1/100  | General | Fava S di C, Netto CF. Epidemiologic surveys of histoplasmin and paracoccidioidin sensitivity in Brazil. Rev Inst Med Trop Sao Paulo. juin 1998;40(3):155-64.                                                                                                     | 8  |
| Brazil | Goias            | 1967 | 114 | 19,2  | 1/1000 | General | Edwards PQ, Billings EL. Worldwide pattern of skin sensitivity to histoplasmin. Am J Trop Med Hyg. mar 1971;20(2):288-319                                                                                                                                         | 6  |
| Brazil | Goias            | 1968 | 453 | 11    | 1/100  | General | Fava S di C, Netto CF. Epidemiologic surveys of histoplasmin and paracoccidioidin sensitivity in Brazil.                                                                                                                                                          | 8  |

|        |              |      |      |      |        |         |                                                                                                                                                                                               |    |
|--------|--------------|------|------|------|--------|---------|-----------------------------------------------------------------------------------------------------------------------------------------------------------------------------------------------|----|
|        |              |      |      |      |        |         | Rev Inst Med Trop Sao Paulo. juin 1998;40(3):155-64.                                                                                                                                          |    |
| Brazil | Minas Gerais | 1970 | 26   | 46,1 | 1/500  | General | Fava S di C, Netto CF. Epidemiologic surveys of histoplasmin and paracoccidioidin sensitivity in Brazil. Rev Inst Med Trop Sao Paulo. juin 1998;40(3):155-64.                                 | 8  |
| Brazil | Minas Gerais | 1970 | 1153 | 11,2 | 1/300  | General | Fava S di C, Netto CF. Epidemiologic surveys of histoplasmin and paracoccidioidin sensitivity in Brazil. Rev Inst Med Trop Sao Paulo. juin 1998;40(3):155-64.                                 | 8  |
| Brazil | Minas Gerais | 1998 | 109  | 44   | 1/500  | General | Silva-Vergara ML, Martínez R. Inquérito epidemiológico com paracoccidioidina e histoplasmina em área agrícola de café em Ibiá, Minas Gerais, Brasil. Rev Iberoam Micol. déc 1998;15(4):294-7. | 11 |
| Brazil | Para         | 1967 | 91   | 27   | 1/1000 | General | Edwards PQ, Billings EL. Worldwide pattern of skin sensitivity to histoplasmin. Am J Trop Med Hyg. mar 1971;20(2):288-319                                                                     | 6  |
| Brazil | Para         | 1975 | 374  | 29,1 | 1/1000 | General | Fava S di C, Netto CF. Epidemiologic surveys of histoplasmin and paracoccidioidin sensitivity in Brazil. Rev Inst Med Trop Sao Paulo. juin 1998;40(3):155-64.                                 | 8  |
| Brazil | Para         | 1988 | 128  | 32   | 1/500  | General | Fava S di C, Netto CF. Epidemiologic surveys of histoplasmin and paracoccidioidin sensitivity in Brazil. Rev Inst Med Trop Sao Paulo. juin 1998;40(3):155-64.                                 | 8  |
| Brazil | Pernambuco   | 1967 | 405  | 17   | 1/500  | General | Fava S di C, Netto CF. Epidemiologic surveys of histoplasmin and paracoccidioidin sensitivity in Brazil. Rev Inst Med Trop Sao Paulo. juin 1998;40(3):155-64.                                 | 8  |



|        |                     |      |     |      |        |         |                                                                                                                                                               |   |
|--------|---------------------|------|-----|------|--------|---------|---------------------------------------------------------------------------------------------------------------------------------------------------------------|---|
| Brazil | Piaui               | 1975 | 177 | 14,7 | 1/1000 | General | Fava S di C, Netto CF. Epidemiologic surveys of histoplasmin and paracoccidioidin sensitivity in Brazil. Rev Inst Med Trop Sao Paulo. juin 1998;40(3):155-64. | 8 |
| Brazil | Rio de Janeiro      | 1949 | 176 | 12,5 | 1/100  | General | Edwards PQ, Billings EL. Worldwide pattern of skin sensitivity to histoplasmin. Am J Trop Med Hyg. mar 1971;20(2):288-319                                     | 6 |
| Brazil | Rio de Janeiro      | 1976 | 370 | 6,8  | 1/100  | General | Fava S di C, Netto CF. Epidemiologic surveys of histoplasmin and paracoccidioidin sensitivity in Brazil. Rev Inst Med Trop Sao Paulo. juin 1998;40(3):155-64. | 8 |
| Brazil | Rio de Janeiro      | 1981 | 436 | 6,88 | 1/1000 | General | Fava S di C, Netto CF. Epidemiologic surveys of histoplasmin and paracoccidioidin sensitivity in Brazil. Rev Inst Med Trop Sao Paulo. juin 1998;40(3):155-64. | 8 |
| Brazil | Rio de Janeiro      | 1985 | 74  | 39,2 | 1/1000 | General | Fava S di C, Netto CF. Epidemiologic surveys of histoplasmin and paracoccidioidin sensitivity in Brazil. Rev Inst Med Trop Sao Paulo. juin 1998;40(3):155-64. | 8 |
| Brazil | Rio Grande do Norte | 1978 | 223 | 23,8 | 1/1000 | General | Fava S di C, Netto CF. Epidemiologic surveys of histoplasmin and paracoccidioidin sensitivity in Brazil. Rev Inst Med Trop Sao Paulo. juin 1998;40(3):155-64. | 8 |
| Brazil | Rio Grande do Sul   | 1949 | 200 | 7    | 1/100  | General | Edwards PQ, Billings EL. Worldwide pattern of skin sensitivity to histoplasmin. Am J Trop Med Hyg. mar 1971;20(2):288-319                                     | 6 |
| Brazil | Sao Paulo           | 1951 | 110 | 18,7 | 1/1000 | General | Fava S di C, Netto CF. Epidemiologic surveys of histoplasmin and paracoccidioidin sensitivity in Brazil.                                                      | 8 |

|        |           |      |      |       |        |         |                                                                                                                                                                                                           |    |
|--------|-----------|------|------|-------|--------|---------|-----------------------------------------------------------------------------------------------------------------------------------------------------------------------------------------------------------|----|
|        |           |      |      |       |        |         | Rev Inst Med Trop Sao Paulo. juin 1998;40(3):155-64.                                                                                                                                                      |    |
| Brazil | Sao Paulo | 1975 | 270  | 20,74 | 1/1000 | General | Fava S di C, Netto CF. Epidemiologic surveys of histoplasmin and paracoccidioidin sensitivity in Brazil. Rev Inst Med Trop Sao Paulo. juin 1998;40(3):155-64.                                             | 8  |
| Brazil | Sao Paulo | 1976 | 79   | 8,9   | 1/1000 | General | Fava S di C, Netto CF. Epidemiologic surveys of histoplasmin and paracoccidioidin sensitivity in Brazil. Rev Inst Med Trop Sao Paulo. juin 1998;40(3):155-64.                                             | 8  |
| Brazil | Sao Paulo | 1978 | 160  | 25    | 1/1000 | General | Campos CM, Netto CF. [Intradermal paracoccidioidin and histoplasmin reactions in urban inhabitants of Bragança Paulista, State of São Paulo, Brazil]. Rev Inst Med Trop Sao Paulo. oct 1978;20(5):289-92. | 12 |
| Brazil | Sao Paulo | 1986 | 180  | 21,6  | 1/1000 | General | Fava S di C, Netto CF. Epidemiologic surveys of histoplasmin and paracoccidioidin sensitivity in Brazil. Rev Inst Med Trop Sao Paulo. juin 1998;40(3):155-64.                                             | 8  |
| Brazil | Sao Paulo | 1986 | 377  | 13    | 1/500  | General | Fava S di C, Netto CF. Epidemiologic surveys of histoplasmin and paracoccidioidin sensitivity in Brazil. Rev Inst Med Trop Sao Paulo. juin 1998;40(3):155-64.                                             | 8  |
| Brazil | Sao Paulo | 1995 | 1638 | 18,1  | 1/500  | General | Fava S di C, Netto CF. Epidemiologic surveys of histoplasmin and paracoccidioidin sensitivity in Brazil. Rev Inst Med Trop Sao Paulo. juin 1998;40(3):155-64.                                             | 8  |
| Brazil | Sao Paulo | 1996 | 115  | 40    | 1/500  | General | Fava S di C, Netto CF. Epidemiologic surveys of histoplasmin and paracoccidioidin sensitivity in Brazil. Rev Inst Med Trop Sao Paulo. juin 1998;40(3):155-64.                                             | 8  |

|          |                    |      |      |      |        |          |                                                                                                                                                                                                                                                   |    |
|----------|--------------------|------|------|------|--------|----------|---------------------------------------------------------------------------------------------------------------------------------------------------------------------------------------------------------------------------------------------------|----|
| Chile    | Viña del Mar       | 1951 | 400  | 0,5  | 1/100  | Children | Edwards PQ, Klaer JH. Worldwide geographic distribution of histoplasmosis and histoplasmin sensitivity. Am J Trop Med Hyg. mars 1956;5(2):235-57.                                                                                                 | 13 |
| Chile    | Santiago           | 1952 | 95   | 1,1  | 1/100  | Students | Vaccaro H, Ferrada Urzua L. [Inquiry into the sensitivity to coccidioidin and histoplasmin in 95 students and assistants of the Institute of Microbiology and Immunology of the University of Chile]. An Fac Med Montev. juin 1952;37(5-6):151-2. | 14 |
| Chile    | Valle de Colliguay | 1952 | 137  | 0    | 1/100  | Children | Edwards PQ, Klaer JH. Worldwide geographic distribution of histoplasmosis and histoplasmin sensitivity. Am J Trop Med Hyg. mars 1956;5(2):235-57.                                                                                                 | 13 |
| Chile    | Santa Rosa         | 1953 | 2242 | 0    | 1/1000 | Children | Corona E, Mardones Restat F. Test de sensibilidad cutánea a la histoplasmina en escolares de la unidad sanitaria Santa Rosa. Rev. chil. pediatr. 1953 ; 24(1): 8-10.                                                                              | 15 |
| Colombia | Antioquia          | 1962 | 760  | 27,8 | 1/100  | General  | Edwards PQ, Billings EL. Worldwide pattern of skin sensitivity to histoplasmin. Am J Trop Med Hyg. mar 1971;20(2):288-319                                                                                                                         | 6  |
| Colombia | Antioquia          | 1968 | 861  | 17,4 | 1/100  | General  | Edwards PQ, Billings EL. Worldwide pattern of skin sensitivity to histoplasmin. Am J Trop Med Hyg. mar 1971;20(2):288-320                                                                                                                         | 6  |
| Colombia | Antioquia          | 1968 | 378  | 26,1 | 1/100  | General  | Edwards PQ, Billings EL. Worldwide pattern of skin sensitivity to histoplasmin. Am J Trop Med Hyg. mar 1971;20(2):288-321                                                                                                                         | 6  |

|          |             |      |     |      |       |         |                                                                                                                           |   |
|----------|-------------|------|-----|------|-------|---------|---------------------------------------------------------------------------------------------------------------------------|---|
| Colombia | Antioquia   | 1968 | 862 | 29,6 | 1/100 | General | Edwards PQ, Billings EL. Worldwide pattern of skin sensitivity to histoplasmin. Am J Trop Med Hyg. mar 1971;20(2):288-322 | 6 |
| Colombia | Antioquia   | 1968 | 877 | 17,1 | 1/100 | General | Edwards PQ, Billings EL. Worldwide pattern of skin sensitivity to histoplasmin. Am J Trop Med Hyg. mar 1971;20(2):288-323 | 6 |
| Colombia | Antioquia   | 1968 | 429 | 13   | 1/100 | General | Edwards PQ, Billings EL. Worldwide pattern of skin sensitivity to histoplasmin. Am J Trop Med Hyg. mar 1971;20(2):288-324 | 6 |
| Colombia | Cauca       | 1963 | 108 | 0,93 | 1/100 | General | Edwards PQ, Billings EL. Worldwide pattern of skin sensitivity to histoplasmin. Am J Trop Med Hyg. mar 1971;20(2):288-325 | 6 |
| Colombia | Cauca       | 1963 | 134 | 3    | 1/100 | General | Edwards PQ, Billings EL. Worldwide pattern of skin sensitivity to histoplasmin. Am J Trop Med Hyg. mar 1971;20(2):288-326 | 6 |
| Colombia | Choco       | 1967 | 171 | 68   | 1/500 | General | Edwards PQ, Billings EL. Worldwide pattern of skin sensitivity to histoplasmin. Am J Trop Med Hyg. mar 1971;20(2):288-327 | 6 |
| Colombia | Choco       | 1968 | 531 | 19,2 | 1/100 | General | Edwards PQ, Billings EL. Worldwide pattern of skin sensitivity to histoplasmin. Am J Trop Med Hyg. mar 1971;20(2):288-328 | 6 |
| Colombia | La Guarjira | 1968 | 740 | 13,5 | 1/100 | General | Edwards PQ, Billings EL. Worldwide pattern of skin sensitivity to histoplasmin. Am J Trop Med Hyg. mar                    | 6 |

|          |                    |      |      |      |        |         |                                                                                                                                                                                   |    |
|----------|--------------------|------|------|------|--------|---------|-----------------------------------------------------------------------------------------------------------------------------------------------------------------------------------|----|
|          |                    |      |      |      |        |         | 1971;20(2):288-329                                                                                                                                                                |    |
| Colombia | La Guajira / Cesar | 1968 | 919  | 19,5 | 1/100  | General | Edwards PQ, Billings EL. Worldwide pattern of skin sensitivity to histoplasmin. Am J Trop Med Hyg. mar 1971;20(2):288-330                                                         | 6  |
| Colombia | Magdalena          | 1961 | 1030 | 40,7 | 1/100  | General | Edwards PQ, Billings EL. Worldwide pattern of skin sensitivity to histoplasmin. Am J Trop Med Hyg. mar 1971;20(2):288-331                                                         | 6  |
| Colombia | Narino             | 1963 | 123  | 57   | 1/100  | General | Edwards PQ, Billings EL. Worldwide pattern of skin sensitivity to histoplasmin. Am J Trop Med Hyg. mar 1971;20(2):288-332                                                         | 6  |
| Colombia | Valle del Cauca    | 1963 | 127  | 51,2 | 1/100  | General | Edwards PQ, Billings EL. Worldwide pattern of skin sensitivity to histoplasmin. Am J Trop Med Hyg. mar 1971;20(2):288-333                                                         | 6  |
| Colombia | Valle del Cauca    | 1963 | 170  | 35   | 1/100  | General | Edwards PQ, Billings EL. Worldwide pattern of skin sensitivity to histoplasmin. Am J Trop Med Hyg. mar 1971;20(2):288-334                                                         | 6  |
| Colombia | Valle del Cauca    | 1964 | 169  | 39,1 | 1/100  | General | Orozco G, Lennox RH, Hayes GS. A study of histoplasmin skin tests among school children in Cali and Candelaria (Valle del Cauca), Colombia. Am J Trop Med Hyg. mai 1964;13:443-8. | 16 |
| Ecuador  | El oro             | 1958 | 126  | 11,1 | 1/1000 | General | Rodriguez MJD. Revision de las micosis profundas en Ecuador. Rev. Ecuat. Hig. Med. Trop., 1958, 15: 177-188.                                                                      | 17 |
| Ecuador  | Esmeraldas         | 1958 | 42   | 21,4 | 1/1000 | General | Rodriguez MJD. Revision de las micosis profundas en                                                                                                                               | 17 |

|           |               |      |     |      |        |          |                                                                                                                             |    |
|-----------|---------------|------|-----|------|--------|----------|-----------------------------------------------------------------------------------------------------------------------------|----|
|           |               |      |     |      |        |          | Ecuador. Rev. Ecuat. Hig. Med. Trop., 1958, 15: 177-188.                                                                    |    |
| Ecuador   | Los Rios      | 1958 | 113 | 25,6 | 1/1000 | General  | Rodriguez MJD. Revision de las micosis profundas en Ecuador. Rev. Ecuat. Hig. Med. Trop., 1958, 15: 177-188.                | 17 |
| Ecuador   | Los Rios      | 1958 | 63  | 23,8 | 1/1000 | General  | Rodriguez MJD. Revision de las micosis profundas en Ecuador. Rev. Ecuat. Hig. Med. Trop., 1958, 15: 177-188.                | 17 |
| Ecuador   | Manabi        | 1958 | 154 | 29,8 | 1/1000 | General  | Rodriguez MJD. Revision de las micosis profundas en Ecuador. Rev. Ecuat. Hig. Med. Trop., 1958, 15: 177-188.                | 17 |
| Guatemala | Amatitlan     | 1960 | 61  | 64   | 1/100  | Patients | Taylor RL, Dobrovolny CG. The distribution of histoplasmin sensitivity in Guatemala. Am J Trop Med Hyg. sept 1960;9:518-22. | 18 |
| Guatemala | Antigua       | 1960 | 75  | 56   | 1/100  | Patients | Taylor RL, Dobrovolny CG. The distribution of histoplasmin sensitivity in Guatemala. Am J Trop Med Hyg. sept 1960;9:518-22. | 18 |
| Guatemala | Escuintla     | 1960 | 57  | 67   | 1/100  | Patients | Taylor RL, Dobrovolny CG. The distribution of histoplasmin sensitivity in Guatemala. Am J Trop Med Hyg. sept 1960;9:518-22. | 18 |
| Guatemala | Guatemala     | 1960 | 147 | 49   | 1/100  | Patients | Taylor RL, Dobrovolny CG. The distribution of histoplasmin sensitivity in Guatemala. Am J Trop Med Hyg. sept 1960;9:518-22. | 18 |
| Guatemala | Huehuetenango | 1960 | 53  | 23   | 1/100  | Patients | Taylor RL, Dobrovolny CG. The distribution of histoplasmin sensitivity in Guatemala. Am J Trop Med Hyg. sept 1960;9:518-22. | 18 |

|            |               |      |       |      |        |                    |                                                                                                                                                                                                  |    |
|------------|---------------|------|-------|------|--------|--------------------|--------------------------------------------------------------------------------------------------------------------------------------------------------------------------------------------------|----|
| Guatemala  | Mazatenango   | 1960 | 69    | 56   | 1/100  | Patients           | Taylor RL, Dobrovoly CG. The distribution of histoplasmin sensitivity in Guatemala. Am J Trop Med Hyg. sept 1960;9:518-22.                                                                       | 18 |
| Guatemala  | Quezaltenango | 1960 | 110   | 54   | 1/100  | Patients           | Taylor RL, Dobrovoly CG. The distribution of histoplasmin sensitivity in Guatemala. Am J Trop Med Hyg. sept 1960;9:518-22.                                                                       | 18 |
| Guatemala  | Quirigua      | 1960 | 86    | 81   | 1/100  | Patients           | Taylor RL, Dobrovoly CG. The distribution of histoplasmin sensitivity in Guatemala. Am J Trop Med Hyg. sept 1960;9:518-22.                                                                       | 18 |
| Guatemala  | Tiquisate     | 1960 | 47    | 66   | 1/100  | Patients           | Taylor RL, Dobrovoly CG. The distribution of histoplasmin sensitivity in Guatemala. Am J Trop Med Hyg. sept 1960;9:518-22.                                                                       | 18 |
| Guatemala  | Zacapa        | 1960 | 116   | 58   | 1/100  | Patients           | Taylor RL, Dobrovoly CG. The distribution of histoplasmin sensitivity in Guatemala. Am J Trop Med Hyg. sept 1960;9:518-22.                                                                       | 18 |
| Fr. Guiana | NA            | 1953 | 425   | 32,5 | 1/1000 | General            | Edwards PQ, Klaer JH. Worldwide geographic distribution of histoplasmosis and histoplasmin sensitivity. Am J Trop Med Hyg. mars 1956;5(2):235-57.                                                | 13 |
| Guyana     | NA            | 1987 | 49    | 47   | NA     | Patients & Workers | Hay RJ, Rose P, Jones TR. Paracoccidioidin sensitization in Guyana: a preliminary skin test survey in hospitalized patients and laboratory workers. Trans R Soc Trop Med Hyg 1987; 81 : 46 – 48. | 19 |
| Honduras   | Choluteca     | 1966 | 21238 | 31,7 | 1/100  | General            | Alvarado R. Resultado del Estudio Epidemiológico de la Histoplasmosis y Coccidioidomicosis realizados en la                                                                                      | 20 |

|          |                   |      |       |      |       |         |                                                                                                                                                                        |    |
|----------|-------------------|------|-------|------|-------|---------|------------------------------------------------------------------------------------------------------------------------------------------------------------------------|----|
|          |                   |      |       |      |       |         | República de Honduras,C. A.<br>1962 -1965. Rev. Med. Hond.                                                                                                             |    |
| Honduras | Comayagua         | 1966 | 548   | 26,3 | 1/100 | General | Alvarado R. Resultado del Estudio Epidemiológico de la Histoplasmosis y Coccidioidomicosis realizados en la República de Honduras,C. A.<br>1962 -1965. Rev. Med. Hond. | 20 |
| Honduras | Cortés            | 1966 | 220   | 44,1 | 1/100 | General | Alvarado R. Resultado del Estudio Epidemiológico de la Histoplasmosis y Coccidioidomicosis realizados en la República de Honduras,C. A.<br>1962 -1965. Rev. Med. Hond. | 20 |
| Honduras | El Paraíso        | 1966 | 20608 | 48,4 | 1/100 | General | Alvarado R. Resultado del Estudio Epidemiológico de la Histoplasmosis y Coccidioidomicosis realizados en la República de Honduras,C. A.<br>1962 -1965. Rev. Med. Hond. | 20 |
| Honduras | Francisco Morazán | 1966 | 18032 | 45,3 | 1/100 | General | Alvarado R. Resultado del Estudio Epidemiológico de la Histoplasmosis y Coccidioidomicosis realizados en la República de Honduras,C. A.<br>1962 -1965. Rev. Med. Hond. | 20 |
| Honduras | La Paz            | 1966 | 8739  | 26,2 | 1/100 | General | Alvarado R. Resultado del Estudio Epidemiológico de la Histoplasmosis y Coccidioidomicosis realizados en la República de Honduras,C. A.<br>1962 -1965. Rev. Med. Hond. | 20 |
| Honduras | Santa Bárbara     | 1966 | 707   | 60,7 | 1/100 | General | Alvarado R. Resultado del Estudio Epidemiológico de la Histoplasmosis y Coccidioidomicosis realizados en la República de Honduras,C. A.                                | 20 |



|          |                   |      |      |      |       |         |                                                                                                                                                                        |    |
|----------|-------------------|------|------|------|-------|---------|------------------------------------------------------------------------------------------------------------------------------------------------------------------------|----|
|          |                   |      |      |      |       |         | 1962 -1965. Rev. Med. Hond.                                                                                                                                            |    |
| Honduras | Valle             | 1966 | 4805 | 25   | 1/100 | General | Alvarado R. Resultado del Estudio Epidemiológico de la Histoplasmosis y Coccidioidomycosis realizados en la República de Honduras,C. A.<br>1962 -1965. Rev. Med. Hond. | 20 |
| Mexico   | Baja California   | 1969 | 5910 | 22   | 1/100 | General | Edwards PQ, Billings EL. Worldwide pattern of skin sensitivity to histoplasmin. Am J Trop Med Hyg. mar 1971;20(2):288-319                                              | 6  |
| Mexico   | Yucatan           | 1969 | 150  | 56   | 1/100 | General | Edwards PQ, Billings EL. Worldwide pattern of skin sensitivity to histoplasmin. Am J Trop Med Hyg. mar 1971;20(2):288-320                                              | 6  |
| Panama   | Islas de San Blás | 1964 | 1038 | 48,9 | 1/100 | General | Edwards PQ, Billings EL. Worldwide pattern of skin sensitivity to histoplasmin. Am J Trop Med Hyg. mar 1971;20(2):288-321                                              | 6  |
| Panama   | Coclé Province    | 1964 | 742  | 23,7 | 1/100 | General | Edwards PQ, Billings EL. Worldwide pattern of skin sensitivity to histoplasmin. Am J Trop Med Hyg. mar 1971;20(2):288-322                                              | 6  |
| Panama   | Coclé Province    | 1964 | 563  | 30,2 | 1/100 | General | Edwards PQ, Billings EL. Worldwide pattern of skin sensitivity to histoplasmin. Am J Trop Med Hyg. mar 1971;20(2):288-323                                              | 6  |
| Panama   | Herrera Province  | 1964 | 440  | 41,1 | 1/100 | General | Edwards PQ, Billings EL. Worldwide pattern of skin sensitivity to histoplasmin. Am J Trop Med Hyg. mar 1971;20(2):288-324                                              | 6  |

|          |                  |      |      |      |        |          |                                                                                                                                                                                  |    |
|----------|------------------|------|------|------|--------|----------|----------------------------------------------------------------------------------------------------------------------------------------------------------------------------------|----|
| Panama   | Herrera Province | 1964 | 578  | 24,2 | 1/100  | General  | Edwards PQ, Billings EL. Worldwide pattern of skin sensitivity to histoplasmin. Am J Trop Med Hyg. mar 1971;20(2):288-325                                                        | 6  |
| Peru     | Ica              | 1955 | 873  | 1,7  | 1/500  | General  | Bouroncle CA, 1955. Sensibilidad a la histoplasmina en algunas localidades del Peru. An. Fac.Med. Limo,38: 1099-1112.                                                            | 21 |
| Peru     | Loreto           | 1955 | 910  | 37   | 1/500  | General  | Bouroncle CA, 1955. Sensibilidad a la histoplasmina en algunas localidades del Peru. An. Fac.Med. Limo,38: 1099-1112.                                                            | 21 |
| Paraguay | Asunción         | 1951 | 2206 | 17,5 | 1/100  | General  | Gines AR, Gould E, Melgarejo De Talavera MS. [Intradermoreaction with histoplasmin; contribution to the study of histoplasmosis in Paraguay]. Hoja Tisiol. déc 1949;9(4):354-63. | 22 |
| Suriname | NA               | 1953 | 831  | 43,1 | 1/1000 | Patients | Collier WA, De la Fuente AA. Die Histoplasmine-reactie te Paramaribo (Suriname). Nederlandsch Tijdschr. v. Geneesk. 97 (1953) 208-213                                            | 23 |
| Uruguay  | Artigas          | 1964 | 3153 | 9,5  | 1/100  | General  | Edwards PQ, Billings EL. Worldwide pattern of skin sensitivity to histoplasmin. Am J Trop Med Hyg. mar 1971;20(2):288-319                                                        | 6  |
| Uruguay  | Durazno          | 1964 | 3063 | 23,4 | 1/100  | General  | Edwards PQ, Billings EL. Worldwide pattern of skin sensitivity to histoplasmin. Am J Trop Med Hyg. mar 1971;20(2):288-320                                                        | 6  |
| Uruguay  | Florida          | 1964 | 1669 | 15,2 | 1/100  | General  | Edwards PQ, Billings EL. Worldwide pattern of skin sensitivity to histoplasmin. Am J Trop Med Hyg. mar                                                                           | 6  |

|           |           |      |      |      |       |         |                                                                                                                                                                                                                                             |    |
|-----------|-----------|------|------|------|-------|---------|---------------------------------------------------------------------------------------------------------------------------------------------------------------------------------------------------------------------------------------------|----|
|           |           |      |      |      |       |         | 1971;20(2):288-321                                                                                                                                                                                                                          |    |
| Uruguay   | Paysandú  | 1964 | 3503 | 8,4  | 1/100 | General | Edwards PQ, Billings EL. Worldwide pattern of skin sensitivity to histoplasmin. Am J Trop Med Hyg. mar 1971;20(2):288-322                                                                                                                   | 6  |
| Uruguay   | Río Negro | 1964 | 5570 | 7,4  | 1/100 | General | Edwards PQ, Billings EL. Worldwide pattern of skin sensitivity to histoplasmin. Am J Trop Med Hyg. mar 1971;20(2):288-323                                                                                                                   | 6  |
| Uruguay   | Salto     | 1964 | 3718 | 6,7  | 1/100 | General | Edwards PQ, Billings EL. Worldwide pattern of skin sensitivity to histoplasmin. Am J Trop Med Hyg. mar 1971;20(2):288-324                                                                                                                   | 6  |
| Uruguay   | San José  | 1964 | 583  | 11,9 | 1/100 | General | Edwards PQ, Billings EL. Worldwide pattern of skin sensitivity to histoplasmin. Am J Trop Med Hyg. mar 1971;20(2):288-325                                                                                                                   | 6  |
| Uruguay   | Soriano   | 1964 | 1918 | 4,2  | 1/100 | General | Edwards PQ, Billings EL. Worldwide pattern of skin sensitivity to histoplasmin. Am J Trop Med Hyg. mar 1971;20(2):288-326                                                                                                                   | 6  |
| Venezuela | Apure     | 1958 | 525  | 8,4  | 1/100 | General | Principe M., A., Convit, J., and Pifano C., F.,1961. Resultados de las encuestas epidemiologicas sobre histoplasmosis, coccidioidomicosis y tuberculosis, realizadas en algunas regiones de Venezuela. Mycopathol. & Mycol. Appi.,15: 11-52 | 24 |
| Venezuela | Aragua    | 1959 | 249  | 39,4 | 1/100 | General | Principe M., A., Convit, J., and Pifano C., F.,1961. Resultados de las encuestas epidemiologicas sobre histoplasmosis, coccidioidomicosis y tuberculosis,                                                                                   | 24 |

|           |         |      |     |      |       |         |                                                                                                                                                                                                                                                   |    |
|-----------|---------|------|-----|------|-------|---------|---------------------------------------------------------------------------------------------------------------------------------------------------------------------------------------------------------------------------------------------------|----|
|           |         |      |     |      |       |         | realizadas en algunas regiones de Venezuela.<br>Mycopathol. & Mycol. Appi.,15: 11-52                                                                                                                                                              |    |
| Venezuela | Bolivar | 1958 | 592 | 89   | 1/100 | General | Principe M., A., Convit, J., and Pifano C., F.,1961.<br>Resultados de las encuestas epidemiologicas sobre histoplasmosis, coccidioidomicosis y tuberculosis, realizadas en algunas regiones de Venezuela.<br>Mycopathol. & Mycol. Appi.,15: 11-52 | 24 |
| Venezuela | Bolivar | 1958 | 627 | 20,1 | 1/100 | General | Principe M., A., Convit, J., and Pifano C., F.,1961.<br>Resultados de las encuestas epidemiologicas sobre histoplasmosis, coccidioidomicosis y tuberculosis, realizadas en algunas regiones de Venezuela.<br>Mycopathol. & Mycol. Appi.,15: 11-52 | 24 |
| Venezuela | Bolivar | 1958 | 302 | 6,6  | 1/100 | General | Principe M., A., Convit, J., and Pifano C., F.,1961.<br>Resultados de las encuestas epidemiologicas sobre histoplasmosis, coccidioidomicosis y tuberculosis, realizadas en algunas regiones de Venezuela.<br>Mycopathol. & Mycol. Appi.,15: 11-52 | 24 |
| Venezuela | Bolivar | 1958 | 356 | 9,3  | 1/100 | General | Principe M., A., Convit, J., and Pifano C., F.,1961.<br>Resultados de las encuestas epidemiologicas sobre histoplasmosis, coccidioidomicosis y tuberculosis, realizadas en algunas regiones de Venezuela.<br>Mycopathol. & Mycol. Appi.,15: 11-52 | 24 |
| Venezuela | Bolivar | 1959 | 77  | 63,6 | 1/100 | General | Principe M., A., Convit, J., and Pifano C., F.,1961.<br>Resultados de las encuestas epidemiologicas sobre histoplasmosis, coccidioidomicosis y tuberculosis,                                                                                      | 24 |

|           |          |      |      |      |       |         |                                                                                                                                                                                                                                                   |    |
|-----------|----------|------|------|------|-------|---------|---------------------------------------------------------------------------------------------------------------------------------------------------------------------------------------------------------------------------------------------------|----|
|           |          |      |      |      |       |         | realizadas en algunas regiones de Venezuela.<br>Mycopathol. & Mycol. Appi.,15: 11-52                                                                                                                                                              |    |
| Venezuela | Carabobo | 1959 | 2859 | 50,5 | 1/100 | General | Principe M., A., Convit, J., and Pifano C., F.,1961.<br>Resultados de las encuestas epidemiologicas sobre histoplasmosis, coccidioidomicosis y tuberculosis, realizadas en algunas regiones de Venezuela.<br>Mycopathol. & Mycol. Appi.,15: 11-52 | 24 |
| Venezuela | Carabobo | 1959 | 471  | 18,1 | 1/100 | General | Principe M., A., Convit, J., and Pifano C., F.,1961.<br>Resultados de las encuestas epidemiologicas sobre histoplasmosis, coccidioidomicosis y tuberculosis, realizadas en algunas regiones de Venezuela.<br>Mycopathol. & Mycol. Appi.,15: 11-52 | 24 |
| Venezuela | Lara     | 1958 | 583  | 18,5 | 1/100 | General | Principe M., A., Convit, J., and Pifano C., F.,1961.<br>Resultados de las encuestas epidemiologicas sobre histoplasmosis, coccidioidomicosis y tuberculosis, realizadas en algunas regiones de Venezuela.<br>Mycopathol. & Mycol. Appi.,15: 11-52 | 24 |
| Venezuela | Lara     | 1958 | 301  | 8,6  | 1/100 | General | Principe M., A., Convit, J., and Pifano C., F.,1961.<br>Resultados de las encuestas epidemiologicas sobre histoplasmosis, coccidioidomicosis y tuberculosis, realizadas en algunas regiones de Venezuela.<br>Mycopathol. & Mycol. Appi.,15: 11-52 | 24 |
| Venezuela | Lara     | 1959 | 754  | 18,9 | 1/100 | General | Principe M., A., Convit, J., and Pifano C., F.,1961.<br>Resultados de las encuestas epidemiologicas sobre histoplasmosis, coccidioidomicosis y tuberculosis,                                                                                      | 24 |

|           |         |      |      |      |       |         |                                                                                                                                                                                                                                                   |    |
|-----------|---------|------|------|------|-------|---------|---------------------------------------------------------------------------------------------------------------------------------------------------------------------------------------------------------------------------------------------------|----|
|           |         |      |      |      |       |         | realizadas en algunas regiones de Venezuela.<br>Mycopathol. & Mycol. Appi.,15: 11-52                                                                                                                                                              |    |
| Venezuela | Merida  | 1958 | 948  | 11,2 | 1/100 | General | Principe M., A., Convit, J., and Pifano C., F.,1961.<br>Resultados de las encuestas epidemiologicas sobre histoplasmosis, coccidioidomicosis y tuberculosis, realizadas en algunas regiones de Venezuela.<br>Mycopathol. & Mycol. Appi.,15: 11-52 | 24 |
| Venezuela | Sucre   | 1957 | 9068 | 60,1 | 1/100 | General | Principe M., A., Convit, J., and Pifano C., F.,1961.<br>Resultados de las encuestas epidemiologicas sobre histoplasmosis, coccidioidomicosis y tuberculosis, realizadas en algunas regiones de Venezuela.<br>Mycopathol. & Mycol. Appi.,15: 11-52 | 24 |
| Venezuela | Tachira | 1958 | 630  | 20   | 1/100 | General | Principe M., A., Convit, J., and Pifano C., F.,1961.<br>Resultados de las encuestas epidemiologicas sobre histoplasmosis, coccidioidomicosis y tuberculosis, realizadas en algunas regiones de Venezuela.<br>Mycopathol. & Mycol. Appi.,15: 11-52 | 24 |
| Venezuela | Yaracuy | 1959 | 4164 | 50   | 1/100 | General | Principe M., A., Convit, J., and Pifano C., F.,1961.<br>Resultados de las encuestas epidemiologicas sobre histoplasmosis, coccidioidomicosis y tuberculosis, realizadas en algunas regiones de Venezuela.<br>Mycopathol. & Mycol. Appi.,15: 11-52 | 24 |
| Venezuela | Yaracuy | 1959 | 1562 | 69,1 | 1/100 | General | Principe M., A., Convit, J., and Pifano C., F.,1961.<br>Resultados de las encuestas epidemiologicas sobre histoplasmosis, coccidioidomicosis y tuberculosis,                                                                                      | 24 |

|           |       |      |     |      |       |         |                                                                                                                                                                                                                                                         |    |
|-----------|-------|------|-----|------|-------|---------|---------------------------------------------------------------------------------------------------------------------------------------------------------------------------------------------------------------------------------------------------------|----|
|           |       |      |     |      |       |         | realizadas en algunas regiones de Venezuela.<br>Mycopathol. & Mycol. Appi.,15: 11-52                                                                                                                                                                    |    |
| Venezuela | Zulia | 1958 | 760 | 56,1 | 1/100 | General | Principe M., A., Convit, J., and Pifano C., F.,1961.<br>Resultados de las encuestas epidemiologicas sobre<br>histoplasmosis, coccidioidomicosis y tuberculosis,<br>realizadas en algunas regiones de Venezuela.<br>Mycopathol. & Mycol. Appi.,15: 11-52 | 24 |

## Input dataset

| STUDY DATA INPUTS          |                                |                   |                               |                      |                      |                                              |         |         |                                        |       |       |                                                       |       |      |
|----------------------------|--------------------------------|-------------------|-------------------------------|----------------------|----------------------|----------------------------------------------|---------|---------|----------------------------------------|-------|-------|-------------------------------------------------------|-------|------|
|                            | Histoplasmin skin test studies |                   | Histoplasmosis prevalence (%) |                      |                      | Number of People living with HIV (year 2012) |         |         | Tuberculosis annual incidence in PLHIV |       |       | Tuberculosis-related deaths annual incidence in PLHIV |       |      |
|                            | # person tested                | # person positive | Mean                          | lower bound of 95%CI | upper bound of 95%CI | N                                            | Low     | high    | N                                      | Low   | high  | N                                                     | Low   | high |
| argentina                  | 740                            | 280               | 37,8                          | 34,3                 | 41,3                 | 98000                                        | 80000   | 120000  | 280                                    | 270   | 630   | 52                                                    | 16    | 110  |
| belize                     | 79                             | 39                | 49,4                          | 38,4                 | 60,4                 | 3100                                         | 2800    | 3400    | 29                                     | 26    | 31    | 3                                                     | 2     | 4    |
| bolivia                    | 2767                           | 609               | 22,0                          | 20,5                 | 23,6                 | 16000                                        | 8500    | 24000   | 420                                    | 390   | 560   | 140                                                   | 100   | 170  |
| Brazil                     | 11044                          | 2239              | 20,3                          | 19,5                 | 21,0                 | 595000                                       | 530000  | 660000  | 14000                                  | 13990 | 14010 | 2200                                                  | 1 600 | 2800 |
| Chile                      | 2874                           | 3                 | 0,1                           | 0,0                  | 0,2                  | 39000                                        | 25000   | 61000   | 51                                     | 48    | 120   | 8                                                     | 4     | 14   |
| Colombia                   | 8389                           | 2103              | 25,1                          | 24,1                 | 26,0                 | 150000                                       | 110000  | 190000  | 1400                                   | 1200  | 1700  | 310                                                   | 230   | 400  |
| Costa Rica                 | NA                             | NA                | 36,9                          | 33,3                 | 39,1                 | 9800                                         | 8800    | 11000   | 61                                     | 55    | 68    | 10                                                    | 8     | 13   |
| Ecuador                    | 498                            | 113               | 22,6                          | 19,0                 | 26,3                 | 52000                                        | 36000   | 99000   | 1200                                   | 1100  | 1400  | 390                                                   | 320   | 460  |
| El Salvador                | NA                             | NA                | 43,6                          | 33,3                 | 60,6                 | 25000                                        | 16000   | 45000   | 220                                    | 210   | 220   | 29                                                    | 20    | 39   |
| French Guiana              | 425                            | 138               | 32,5                          | 28,0                 | 37,0                 | 2900                                         | 1935    | 3390    | 22                                     | 15    | 26    | 1                                                     | NA    | NA   |
| Guatemala                  | 821                            | 469               | 57,2                          | 53,8                 | 60,6                 | 58000                                        | 36000   | 130000  | 900                                    | 810   | 1000  | 410                                                   | 340   | 480  |
| Guyana                     | 49                             | 23                | 47,0                          | 33,0                 | 61,0                 | 7200                                         | 4300    | 12000   | 200                                    | 200   | 270   | 33                                                    | 21    | 48   |
| Honduras                   | 74897                          | 29036             | 38,8                          | 38,4                 | 39,1                 | 26000                                        | 21000   | 33000   | 460                                    | 360   | 560   | 110                                                   | 76    | 150  |
| Mexico                     | 6060                           | 1384              | 22,8                          | 21,8                 | 23,9                 | 170000                                       | 150000  | 210000  | 2500                                   | 2500  | 2600  | 430                                                   | 330   | 540  |
| Nicaragua                  | NA                             | NA                | 36,9                          | 33,3                 | 39,1                 | 9600                                         | 6600    | 15000   | 110                                    | 100   | 120   | 17                                                    | 13    | 22   |
| Panama                     | 3361                           | 1174              | 34,9                          | 33,3                 | 36,5                 | 17000                                        | 12000   | 22000   | 280                                    | 250   | 310   | 47                                                    | 35    | 61   |
| Paraguay                   | 2206                           | 386               | 17,5                          | 15,9                 | 19,1                 | 13000                                        | 7400    | 24000   | 280                                    | 260   | 300   | 57                                                    | 46    | 69   |
| Peru                       | 1783                           | 352               | 19,7                          | 17,9                 | 21,6                 | 76000                                        | 36000   | 230000  | 2400                                   | 2200  | 2700  | 450                                                   | 340   | 570  |
| Suriname                   | 831                            | 358               | 43,1                          | 39,7                 | 46,5                 | 4000                                         | 3600    | 4400    | 59                                     | 51    | 67    | 15                                                    | 11    | 19   |
| Uruguay                    | 23177                          | 2375              | 10,2                          | 9,9                  | 10,6                 | 13000                                        | 9800    | 19000   | 130                                    | 120   | 140   | 20                                                    | 15    | 26   |
| Venezuela                  | 24828                          | 11972             | 48,2                          | 47,6                 | 48,8                 | 110000                                       | 74000   | 160000  | 1200                                   | 1000  | 1200  | 330                                                   | 250   | 410  |
| <b>Total Latin America</b> | 164829                         | 53054             | 32,2                          | 32,0                 | 32,4                 | 1500000                                      | 1200000 | 1900000 | 26202                                  | 25155 | 28032 | 5062                                                  | 3 777 | 6405 |



## Output estimates dataset

| MODEL OUTPUT ESTIMATES (1) |                                         |                  |                   |                                            |                  |                   |                                                       |                  |                   |        |                  |                   |                                                                             |                  |                   |                                                                              |                  |                   |                                                                              |                  |                   |
|----------------------------|-----------------------------------------|------------------|-------------------|--------------------------------------------|------------------|-------------------|-------------------------------------------------------|------------------|-------------------|--------|------------------|-------------------|-----------------------------------------------------------------------------|------------------|-------------------|------------------------------------------------------------------------------|------------------|-------------------|------------------------------------------------------------------------------|------------------|-------------------|
|                            | Histoplasmosis prevalence estimates (%) |                  |                   | Number of People living with HIV estimates |                  |                   | Estimates of Histoplasmosis annual incidence in PLHIV |                  |                   |        |                  |                   | Estimates of Symptomatic Histoplasmosis-HIV incidence (30%scenario) (N[30]) |                  |                   | Estimates of Symptomatic Histoplasmosis-HIV incidence (scenario 50%) (N[50]) |                  |                   | Estimates of Symptomatic Histoplasmosis-HIV incidence (scenario 70%) (N[70]) |                  |                   |
|                            | Median                                  | 2.5th percentile | 97.5th percentile | Median                                     | 2.5th percentile | 97.5th percentile | p100 PLHIV                                            |                  |                   | N      |                  |                   | Median                                                                      | 2.5th percentile | 97.5th percentile | Median                                                                       | 2.5th percentile | 97.5th percentile | Median                                                                       | 2.5th percentile | 97.5th percentile |
|                            |                                         |                  |                   |                                            |                  |                   | Median                                                | 2.5th percentile | 97.5th percentile | Median | 2.5th percentile | 97.5th percentile |                                                                             |                  |                   |                                                                              |                  |                   |                                                                              |                  |                   |
| Argentina                  | 37,8                                    | 35,3             | 40,3              | 98502                                      | 84984            | 113188            | 1,89                                                  | 1,7              | 2,1               | 1864   | 1546             | 2232              | 559                                                                         | 464              | 670               | 932                                                                          | 773              | 1116              | 1305                                                                         | 1082             | 1562              |
| Belize                     | 49,4                                    | 41,7             | 57,1              | 3101                                       | 2888             | 3311              | 3,04                                                  | 2,22             | 4,15              | 94     | 68               | 130               | 28                                                                          | 21               | 39                | 47                                                                           | 34               | 65                | 66                                                                           | 48               | 91                |
| Bolivia                    | 22,0                                    | 20,9             | 23,1              | 16037                                      | 10630            | 21590             | 0,88                                                  | 0,82             | 0,94              | 141    | 93               | 191               | 42                                                                          | 28               | 57                | 70                                                                           | 47               | 96                | 99                                                                           | 65               | 134               |
| Brazil                     | 20,3                                    | 19,7             | 20,8              | 594895                                     | 549228           | 640887            | 0,79                                                  | 0,77             | 0,82              | 4714   | 4321             | 5120              | 1414                                                                        | 1296             | 1536              | 2357                                                                         | 2161             | 2560              | 3300                                                                         | 3025             | 3584              |
| Chile                      | 0,1                                     | 0,0              | 0,2               | 40001                                      | 28580            | 53711             | 0,00                                                  | 0,00             | 0,01              | 1,22   | 0,35             | 2,36              | 0,37                                                                        | 0,10             | 0,71              | 0,61                                                                         | 0,17             | 1,18              | 0,85                                                                         | 0,24             | 1,65              |
| Colombia                   | 25,1                                    | 24,4             | 25,7              | 150084                                     | 121636           | 178178            | 1,04                                                  | 1,01             | 1,08              | 1565   | 1264             | 1867              | 469                                                                         | 379              | 560               | 782                                                                          | 632              | 933               | 1095                                                                         | 885              | 1307              |
| Costa Rica                 | 36,7                                    | 34,5             | 38,5              | 9821                                       | 9080             | 10630             | 1,81                                                  | 1,64             | 1,95              | 177    | 156              | 199               | 53                                                                          | 47               | 60                | 89                                                                           | 78               | 100               | 124                                                                          | 109              | 140               |
| Ecuador                    | 22,6                                    | 20,0             | 25,2              | 55992                                      | 39425            | 81116             | 0,91                                                  | 0,78             | 1,05              | 508    | 346              | 762               | 153                                                                         | 104              | 228               | 254                                                                          | 173              | 381               | 356                                                                          | 242              | 533               |
| El Salvador                | 44,5                                    | 35,9             | 55,0              | 26416                                      | 18047            | 37880             | 2,50                                                  | 1,75             | 3,8               | 660    | 383              | 1166              | 198                                                                         | 115              | 350               | 330                                                                          | 191              | 583               | 462                                                                          | 268              | 816               |
| French Guiana              | 32,5                                    | 29,3             | 35,7              | 2839                                       | 2270             | 3271              | 1,50                                                  | 1,29             | 1,73              | 42     | 32               | 53                | 13                                                                          | 10               | 16                | 21                                                                           | 16               | 26                | 30                                                                           | 23               | 37                |
| Guatemala                  | 57,2                                    | 54,8             | 59,6              | 64264                                      | 40473            | 102349            | 4,16                                                  | 3,78             | 4,6               | 2676   | 1665             | 4322              | 803                                                                         | 500              | 1297              | 1338                                                                         | 833              | 2161              | 1873                                                                         | 1166             | 3025              |
| Guyana                     | 47,0                                    | 37,1             | 56,9              | 7442                                       | 5037             | 10398             | 2,76                                                  | 1,84             | 4,12              | 204    | 116              | 353               | 61                                                                          | 35               | 106               | 102                                                                          | 58               | 177               | 143                                                                          | 81               | 247               |
| Honduras                   | 38,8                                    | 38,5             | 39,0              | 26255                                      | 22337            | 30761             | 1,97                                                  | 1,95             | 1,99              | 518    | 441              | 607               | 155                                                                         | 132              | 182               | 259                                                                          | 220              | 304               | 363                                                                          | 308              | 425               |
| Mexico                     | 22,8                                    | 22,1             | 23,6              | 172541                                     | 154791           | 195962            | 0,92                                                  | 0,88             | 0,96              | 1589   | 1411             | 1818              | 477                                                                         | 423              | 545               | 794                                                                          | 706              | 909               | 1112                                                                         | 988              | 1273              |
| Nicaragua                  | 36,7                                    | 34,5             | 38,6              | 9899                                       | 7339             | 13140             | 1,81                                                  | 1,64             | 1,95              | 179    | 130              | 241               | 54                                                                          | 39               | 72                | 89                                                                           | 65               | 120               | 125                                                                          | 91               | 168               |
| Panama                     | 34,9                                    | 33,8             | 36,0              | 16985                                      | 13466            | 20536             | 1,67                                                  | 1,59             | 1,75              | 284    | 224              | 346               | 85                                                                          | 67               | 104               | 142                                                                          | 112              | 173               | 198                                                                          | 157              | 242               |
| Paraguay                   | 17,5                                    | 16,4             | 18,6              | 13700                                      | 8747             | 20148             | 0,66                                                  | 0,61             | 0,71              | 90     | 57               | 134               | 27                                                                          | 17               | 40                | 45                                                                           | 29               | 67                | 63                                                                           | 40               | 94                |
| Peru                       | 19,7                                    | 18,4             | 21,0              | 90626                                      | 43950            | 169366            | 0,76                                                  | 0,7              | 0,83              | 693    | 334              | 1302              | 208                                                                         | 100              | 391               | 346                                                                          | 167              | 651               | 485                                                                          | 234              | 912               |
| Suriname                   | 43,1                                    | 40,7             | 45,5              | 4001                                       | 3716             | 4283              | 2,36                                                  | 2,14             | 2,6               | 94     | 83               | 107               | 28                                                                          | 25               | 32                | 47                                                                           | 42               | 53                | 66                                                                           | 58               | 75                |
| Uruguay                    | 10,2                                    | 10,0             | 10,5              | 13344                                      | 10585            | 16935             | 0,35                                                  | 0,35             | 0,36              | 47     | 37               | 60                | 14                                                                          | 11               | 18                | 24                                                                           | 19               | 30                | 33                                                                           | 26               | 42                |
| Venezuela                  | 48,2                                    | 47,8             | 48,6              | 111908                                     | 83567            | 144050            | 2,9                                                   | 2,85             | 2,95              | 3243   | 2422             | 4178              | 973                                                                         | 727              | 1253              | 1622                                                                         | 1211             | 2089              | 2270                                                                         | 1695             | 2925              |
| Total Latin America        | 32,2                                    | 32,0             | 32,4              | 1512642                                    | 1280792          | 1773148           | 1,48                                                  | 1,47             | 1,49              | 22367  | 18934            | 26225             | 6710                                                                        | 5680             | 7867              | 11183                                                                        | 9467             | 13112             | 15657                                                                        | 13254            | 18357             |

MODEL OUTPUT ESTIMATES (2)

|                        | Estimates of Histoplasmosis-HIV deaths<br>((N[30])-10% case-fatality rate) |                     |                      | Estimates of Histoplasmosis-HIV deaths<br>((N[50])-10% case-fatality rate) |                     |                      | Estimates of Histoplasmosis-HIV deaths<br>((N[70])-10% case-fatality rate) |                     |                      | Estimates of Histoplasmosis-HIV deaths<br>((N[30])-20% case-fatality rate) |                     |                      | Estimates of Histoplasmosis-HIV deaths<br>((N[50])-20% case-fatality rate) |                     |                      | Estimates of Histoplasmosis-HIV deaths<br>((N[70])-20% case-fatality rate) |                     |                      |
|------------------------|----------------------------------------------------------------------------|---------------------|----------------------|----------------------------------------------------------------------------|---------------------|----------------------|----------------------------------------------------------------------------|---------------------|----------------------|----------------------------------------------------------------------------|---------------------|----------------------|----------------------------------------------------------------------------|---------------------|----------------------|----------------------------------------------------------------------------|---------------------|----------------------|
|                        | Median                                                                     | 2.5th<br>percentile | 97.5th<br>percentile |
| argentina              | 56                                                                         | 46                  | 67                   | 93                                                                         | 77                  | 112                  | 130                                                                        | 108                 | 156                  | 112                                                                        | 93                  | 134                  | 186                                                                        | 155                 | 223                  | 261                                                                        | 216                 | 312                  |
| belize                 | 3                                                                          | 2                   | 4                    | 5                                                                          | 3                   | 6                    | 7                                                                          | 5                   | 9                    | 6                                                                          | 4                   | 8                    | 9                                                                          | 7                   | 13                   | 13                                                                         | 10                  | 18                   |
| bolivia                | 4                                                                          | 3                   | 6                    | 7                                                                          | 5                   | 10                   | 10                                                                         | 7                   | 13                   | 8                                                                          | 6                   | 11                   | 14                                                                         | 9                   | 19                   | 20                                                                         | 13                  | 27                   |
| Brazil                 | 141                                                                        | 130                 | 154                  | 236                                                                        | 216                 | 256                  | 330                                                                        | 302                 | 358                  | 283                                                                        | 259                 | 307                  | 471                                                                        | 432                 | 512                  | 660                                                                        | 605                 | 717                  |
| Chile                  | 0,04                                                                       | 0,01                | 0,07                 | 0,06                                                                       | 0,02                | 0,12                 | 0,09                                                                       | 0,02                | 0,17                 | 0,07                                                                       | 0,02                | 0,14                 | 0,12                                                                       | 0,03                | 0,24                 | 0,17                                                                       | 0,05                | 0,33                 |
| Colombia               | 47                                                                         | 38                  | 56                   | 78                                                                         | 63                  | 93                   | 110                                                                        | 89                  | 131                  | 94                                                                         | 76                  | 112                  | 156                                                                        | 126                 | 187                  | 219                                                                        | 177                 | 261                  |
| Costa Rica             | 5                                                                          | 5                   | 6                    | 9                                                                          | 8                   | 10                   | 12                                                                         | 11                  | 14                   | 11                                                                         | 9                   | 12                   | 18                                                                         | 16                  | 20                   | 25                                                                         | 22                  | 28                   |
| Ecuador                | 15                                                                         | 10                  | 23                   | 25                                                                         | 17                  | 38                   | 36                                                                         | 24                  | 53                   | 31                                                                         | 21                  | 46                   | 51                                                                         | 35                  | 76                   | 71                                                                         | 48                  | 107                  |
| El Salvador            | 20                                                                         | 11                  | 35                   | 33                                                                         | 19                  | 58                   | 46                                                                         | 27                  | 82                   | 40                                                                         | 23                  | 70                   | 66                                                                         | 38                  | 117                  | 92                                                                         | 54                  | 163                  |
| French Guiana          | 1                                                                          | 1                   | 2                    | 2                                                                          | 2                   | 3                    | 3                                                                          | 2                   | 4                    | 3                                                                          | 2                   | 3                    | 4                                                                          | 3                   | 5                    | 6                                                                          | 5                   | 7                    |
| Guatemala              | 80                                                                         | 50                  | 130                  | 134                                                                        | 83                  | 216                  | 187                                                                        | 117                 | 303                  | 161                                                                        | 100                 | 259                  | 268                                                                        | 167                 | 432                  | 375                                                                        | 233                 | 605                  |
| Guyana                 | 6                                                                          | 3                   | 11                   | 10                                                                         | 6                   | 18                   | 14                                                                         | 8                   | 25                   | 12                                                                         | 7                   | 21                   | 20                                                                         | 12                  | 35                   | 29                                                                         | 16                  | 49                   |
| Honduras               | 16                                                                         | 13                  | 18                   | 26                                                                         | 22                  | 30                   | 36                                                                         | 31                  | 43                   | 31                                                                         | 26                  | 36                   | 52                                                                         | 44                  | 61                   | 73                                                                         | 62                  | 85                   |
| Mexico                 | 48                                                                         | 42                  | 55                   | 79                                                                         | 71                  | 91                   | 111                                                                        | 99                  | 127                  | 95                                                                         | 85                  | 109                  | 159                                                                        | 141                 | 182                  | 222                                                                        | 198                 | 255                  |
| Nicaragua              | 5                                                                          | 4                   | 7                    | 9                                                                          | 7                   | 12                   | 13                                                                         | 9                   | 17                   | 11                                                                         | 8                   | 14                   | 18                                                                         | 13                  | 24                   | 25                                                                         | 18                  | 34                   |
| Panama                 | 9                                                                          | 7                   | 10                   | 14                                                                         | 11                  | 17                   | 20                                                                         | 16                  | 24                   | 17                                                                         | 13                  | 21                   | 28                                                                         | 22                  | 35                   | 40                                                                         | 31                  | 48                   |
| Paraguay               | 3                                                                          | 2                   | 4                    | 5                                                                          | 3                   | 7                    | 6                                                                          | 4                   | 9                    | 5                                                                          | 3                   | 8                    | 9                                                                          | 6                   | 13                   | 13                                                                         | 8                   | 19                   |
| Peru                   | 21                                                                         | 10                  | 39                   | 35                                                                         | 17                  | 65                   | 48                                                                         | 23                  | 91                   | 42                                                                         | 20                  | 78                   | 69                                                                         | 33                  | 130                  | 97                                                                         | 47                  | 182                  |
| Suriname               | 3                                                                          | 3                   | 3                    | 5                                                                          | 4                   | 5                    | 7                                                                          | 6                   | 7                    | 6                                                                          | 5                   | 6                    | 9                                                                          | 8                   | 11                   | 13                                                                         | 12                  | 15                   |
| Uruguay                | 1                                                                          | 1                   | 2                    | 2                                                                          | 2                   | 3                    | 3                                                                          | 3                   | 4                    | 3                                                                          | 2                   | 4                    | 5                                                                          | 4                   | 6                    | 7                                                                          | 5                   | 8                    |
| Venezuela              | 97                                                                         | 73                  | 125                  | 162                                                                        | 121                 | 209                  | 227                                                                        | 170                 | 292                  | 195                                                                        | 145                 | 251                  | 324                                                                        | 242                 | 418                  | 454                                                                        | 339                 | 585                  |
| Total<br>Latin America | 671                                                                        | 568                 | 787                  | 1118                                                                       | 947                 | 1311                 | 1566                                                                       | 1325                | 1836                 | 1342                                                                       | 1136                | 1573                 | 2237                                                                       | 1893                | 2622                 | 3131                                                                       | 2651                | 3671                 |

MODEL OUTPUT ESTIMATES (3)

|               | Estimates of Histoplasmosis-HIV deaths<br>((N[30])-40% case-fatality rate) |                     |                      | Estimates of Histoplasmosis-HIV deaths<br>((N[50])-40% case-fatality rate) |                     |                      | Estimates of Histoplasmosis-HIV deaths<br>((N[70])-40% case-fatality rate) |                     |                      | Estimates of Histoplasmosis-HIV deaths<br>((N[30])-60% case-fatality rate) |                     |                      | Estimates of Histoplasmosis-HIV deaths<br>((N[50])-60% case-fatality rate) |                     |                      | Estimates of Histoplasmosis-HIV deaths<br>((N[70])-60% case-fatality rate) |                     |                      |
|---------------|----------------------------------------------------------------------------|---------------------|----------------------|----------------------------------------------------------------------------|---------------------|----------------------|----------------------------------------------------------------------------|---------------------|----------------------|----------------------------------------------------------------------------|---------------------|----------------------|----------------------------------------------------------------------------|---------------------|----------------------|----------------------------------------------------------------------------|---------------------|----------------------|
|               | Median                                                                     | 2.5th<br>percentile | 97.5th<br>percentile |
| argentina     | 224                                                                        | 186                 | 268                  | 373                                                                        | 309                 | 446                  | 522                                                                        | 433                 | 625                  | 335,46                                                                     | 278,3               | 401,75               | 559,11                                                                     | 463,84              | 669,59               | 782,75                                                                     | 649,38              | 937,42               |
| belize        | 11                                                                         | 8                   | 16                   | 19                                                                         | 14                  | 26                   | 26                                                                         | 19                  | 36                   | 16,95                                                                      | 12,3                | 23,36                | 28,25                                                                      | 20,5                | 38,93                | 39,55                                                                      | 28,7                | 54,51                |
| bolivia       | 17                                                                         | 11                  | 23                   | 28                                                                         | 19                  | 38                   | 39                                                                         | 26                  | 54                   | 25,37                                                                      | 16,74               | 34,47                | 42,29                                                                      | 27,91               | 57,44                | 59,2                                                                       | 39,07               | 80,42                |
| Brazil        | 566                                                                        | 519                 | 614                  | 943                                                                        | 864                 | 1024                 | 1320                                                                       | 1210                | 1434                 | 848,57                                                                     | 777,83              | 921,68               | 1414,29                                                                    | 1296,38             | 1536,13              | 1980                                                                       | 1814,94             | 2150,58              |
| Chile         | 0,15                                                                       | 0,04                | 0,28                 | 0,24                                                                       | 0,07                | 0,47                 | 0,34                                                                       | 0,10                | 0,66                 | 0,22                                                                       | 0,06                | 0,43                 | 0,37                                                                       | 0,10                | 0,71                 | 0,51                                                                       | 0,15                | 0,99                 |
| Colombia      | 188                                                                        | 152                 | 224                  | 313                                                                        | 253                 | 373                  | 438                                                                        | 354                 | 523                  | 281,64                                                                     | 227,56              | 336,05               | 469,4                                                                      | 379,27              | 560,08               | 657,16                                                                     | 530,97              | 784,11               |
| Costa Rica    | 21                                                                         | 19                  | 24                   | 35                                                                         | 31                  | 40                   | 50                                                                         | 44                  | 56                   | 31,91                                                                      | 28,14               | 35,87                | 53,18                                                                      | 46,9                | 59,79                | 74,46                                                                      | 65,66               | 83,71                |
| Ecuador       | 61                                                                         | 41                  | 91                   | 102                                                                        | 69                  | 152                  | 142                                                                        | 97                  | 213                  | 91,53                                                                      | 62,21               | 137,09               | 152,54                                                                     | 103,68              | 228,48               | 213,56                                                                     | 145,16              | 319,88               |
| El Salvador   | 79                                                                         | 46                  | 140                  | 132                                                                        | 77                  | 233                  | 185                                                                        | 107                 | 327                  | 118,88                                                                     | 68,85               | 209,89               | 198,13                                                                     | 114,76              | 349,82               | 277,38                                                                     | 160,66              | 489,74               |
| French Guiana | 5                                                                          | 4                   | 6                    | 8                                                                          | 6                   | 11                   | 12                                                                         | 9                   | 15                   | 7,62                                                                       | 5,84                | 9,49                 | 12,7                                                                       | 9,74                | 15,81                | 17,79                                                                      | 13,63               | 22,13                |
| Guatemala     | 321                                                                        | 200                 | 519                  | 535                                                                        | 333                 | 864                  | 749                                                                        | 466                 | 1210                 | 481,7                                                                      | 299,78              | 777,93               | 802,83                                                                     | 499,63              | 1296,55              | 1123,96                                                                    | 699,48              | 1815,17              |
| Guyana        | 25                                                                         | 14                  | 42                   | 41                                                                         | 23                  | 71                   | 57                                                                         | 32                  | 99                   | 36,79                                                                      | 20,83               | 63,55                | 61,32                                                                      | 34,71               | 105,92               | 85,85                                                                      | 48,6                | 148,29               |
| Honduras      | 62                                                                         | 53                  | 73                   | 104                                                                        | 88                  | 121                  | 145                                                                        | 123                 | 170                  | 93,27                                                                      | 79,31               | 109,34               | 155,45                                                                     | 132,19              | 182,23               | 217,63                                                                     | 185,07              | 255,12               |
| Mexico        | 191                                                                        | 169                 | 218                  | 318                                                                        | 282                 | 364                  | 445                                                                        | 395                 | 509                  | 285,98                                                                     | 254                 | 327,24               | 476,63                                                                     | 423,33              | 545,4                | 667,29                                                                     | 592,66              | 763,56               |
| Nicaragua     | 21                                                                         | 16                  | 29                   | 36                                                                         | 26                  | 48                   | 50                                                                         | 36                  | 67                   | 32,13                                                                      | 23,46               | 43,32                | 53,55                                                                      | 39,09               | 72,19                | 74,98                                                                      | 54,73               | 101,07               |
| Panama        | 34                                                                         | 27                  | 41                   | 57                                                                         | 45                  | 69                   | 79                                                                         | 63                  | 97                   | 51,04                                                                      | 40,28               | 62,23                | 85,06                                                                      | 67,13               | 103,72               | 119,09                                                                     | 93,99               | 145,21               |
| Paraguay      | 11                                                                         | 7                   | 16                   | 18                                                                         | 11                  | 27                   | 25                                                                         | 16                  | 38                   | 16,29                                                                      | 10,31               | 24,14                | 27,15                                                                      | 17,19               | 40,24                | 38                                                                         | 24,07               | 56,33                |
| Peru          | 83                                                                         | 40                  | 156                  | 139                                                                        | 67                  | 260                  | 194                                                                        | 94                  | 365                  | 124,68                                                                     | 60,14               | 234,4                | 207,8                                                                      | 100,23              | 390,66               | 290,92                                                                     | 140,32              | 546,93               |
| Suriname      | 11                                                                         | 10                  | 13                   | 19                                                                         | 17                  | 21                   | 26                                                                         | 23                  | 30                   | 16,97                                                                      | 14,98               | 19,19                | 28,29                                                                      | 24,97               | 31,99                | 39,61                                                                      | 34,96               | 44,79                |
| Uruguay       | 6                                                                          | 5                   | 7                    | 9                                                                          | 7                   | 12                   | 13                                                                         | 10                  | 17                   | 8,51                                                                       | 6,74                | 10,83                | 14,19                                                                      | 11,24               | 18,05                | 19,86                                                                      | 15,73               | 25,27                |
| Venezuela     | 389                                                                        | 291                 | 501                  | 649                                                                        | 484                 | 836                  | 908                                                                        | 678                 | 1170                 | 583,81                                                                     | 435,94              | 752,07               | 973,01                                                                     | 726,56              | 1253,46              | 1362,22                                                                    | 1017,19             | 1754,84              |
| Total         | 2684                                                                       | 2272                | 3147                 | 4473                                                                       | 3787                | 5245                 | 6263                                                                       | 5302                | 7343                 | 4026,02                                                                    | 3408,21             | 4720,46              | 6710,03                                                                    | 5680,35             | 7867,43              | 9394,04                                                                    | 7952,48             | 11014,4              |
| Latin America |                                                                            |                     |                      |                                                                            |                     |                      |                                                                            |                     |                      |                                                                            |                     |                      |                                                                            |                     |                      |                                                                            |                     |                      |

## Model SAS code

```
libname library '.';
```

```
/*  
**** MACROS ****  
*/
```

```
%MACRO PERT_GLOBAL(pays,nbech,init1,modeprev,minprev,maxprev,init2,modehivinc,minhivinc,maxhivinc);
```

```
dm log 'clear';
```

```
/*  
%PERT(&nbech,&init1,&modeprev, &minprev,&maxprev, 4,prevalence,histoprev);  
%PERT(&nbech,&init2,&modehivinc, &minhivinc,&maxhivinc,4,hivincid,hivincidnum);
```

```
/* Calculation of incidence */
```

```
data pert_final_&pays;  
merge pert_prevalence pert_hivincid;
```

```
PERT_histoincid=(PERT_histoprev/100)/(0.321*(1-(PERT_histoprev/100)));  
PERT_histoincidnum=PERT_histoincid*PERT_hivincidnum/100;
```

```
PERT_histoincidnum_30=PERT_histoincidnum*0.3;    PERT_histoincidnum_50=PERT_histoincidnum*0.5;  
PERT_histoincidnum_70=PERT_histoincidnum*0.7;
```

```
PERT_histoincidnum_30_l10=PERT_histoincidnum_30*0.1;PERT_histoincidnum_50_l10=PERT_histoincidnum_50*0.1;PERT_histoincidnum_70_l10=PERT_his  
toincidnum_70*0.1;
```

```
PERT_histoincidnum_30_l20=PERT_histoincidnum_30*0.2;PERT_histoincidnum_50_l20=PERT_histoincidnum_50*0.2;PERT_histoincidnum_70_l20=PERT_his  
toincidnum_70*0.2;
```

```
PERT_histoicidnum_30_l40=PERT_histoicidnum_30*0.4;PERT_histoicidnum_50_l40=PERT_histoicidnum_50*0.4;PERT_histoicidnum_70_l40=PERT_histoicidnum_70*0.4;
```

```
PERT_histoicidnum_30_l60=PERT_histoicidnum_30*0.6;PERT_histoicidnum_50_l60=PERT_histoicidnum_50*0.6;PERT_histoicidnum_70_l60=PERT_histoicidnum_70*0.6;
```

```
run;
```

```
/*Calculate median and percentiles (2.5%/97.5%) from the output distribution of each parameter*/
```

```
%PERT_STAT(final_&pays,histoicid);
```

```
%PERT_STAT(final_&pays,histoicidnum);
```

```
%PERT_STAT(final_&pays,histoicidnum_30); %PERT_STAT(final_&pays,histoicidnum_50); %PERT_STAT(final_&pays,histoicidnum_70);
```

```
%PERT_STAT(final_&pays,histoicidnum_30_l10);%PERT_STAT(final_&pays,histoicidnum_50_l10);%PERT_STAT(final_&pays,histoicidnum_70_l10);
```

```
%PERT_STAT(final_&pays,histoicidnum_30_l20);%PERT_STAT(final_&pays,histoicidnum_50_l20);%PERT_STAT(final_&pays,histoicidnum_70_l20);
```

```
%PERT_STAT(final_&pays,histoicidnum_30_l40);%PERT_STAT(final_&pays,histoicidnum_50_l40);%PERT_STAT(final_&pays,histoicidnum_70_l40);
```

```
%PERT_STAT(final_&pays,histoicidnum_30_l60);%PERT_STAT(final_&pays,histoicidnum_50_l60);%PERT_STAT(final_&pays,histoicidnum_70_l60);
```

```
data library.pert_final_stat_&pays;
```

```
length country $30.;
```

```
merge PERT_histoprev_stat PERT_hivincidnum_stat PERT_histoicid_stat PERT_histoicidnum_stat
```

```
PERT_histoicidnum_30_stat PERT_histoicidnum_50_stat PERT_histoicidnum_70_stat
```

```
PERT_histoicidnum_30_l10_stat PERT_histoicidnum_50_l10_stat PERT_histoicidnum_70_l10_stat
```

```
PERT_histoicidnum_30_l20_stat PERT_histoicidnum_50_l20_stat PERT_histoicidnum_70_l20_stat
```

```
PERT_histoicidnum_30_l40_stat PERT_histoicidnum_50_l40_stat PERT_histoicidnum_70_l40_stat
```

```
PERT_histoicidnum_30_l60_stat PERT_histoicidnum_50_l60_stat PERT_histoicidnum_70_l60_stat
```

```
;
```

```
country="&pays";
```

```
run;
```

```
options orientation=landscape;
```

```

ods rtf body="&pays..rtf" style=minimal;
title "&pays";
proc print data=library.pert_final_stat_&pays noobs;
var PERT_histoprev;;
format PERT_histoprev: 5.2;
run;
proc print data=library.pert_final_stat_&pays noobs;
var PERT_hivincidnum;;
run;
proc print data=library.pert_final_stat_&pays noobs;
var PERT_histoincid_median PERT_histoincid_p2_5 PERT_histoincid_p97_5 PERT_histoincidnum_median PERT_histoincidnum_p2_5
PERT_histoincidnum_p97_5;
format PERT_histoincid_median PERT_histoincid_p2_5 PERT_histoincid_p97_5 PERT_histoincidnum_median PERT_histoincidnum_p2_5
PERT_histoincidnum_p97_5 5.2;
run;
%LISTING(30,&pays);
%LISTING(50,&pays);
%LISTING(70,&pays);

ods rtf close;

%MEND PERT_GLOBAL;

%MACRO PERT(n,init,val_mode,val_min, val_max,lambda,tableout,var);

data param;

range =&val_max - &val_min;

mu=%sysevalf((&val_min + &val_max + &lambda * &val_mode ) / ( &lambda + 2 ));

if mu=%sysevalf(&val_mode) then v=(&lambda/2)+1;
else v=(( mu - &val_min ) * ( 2 * &val_mode - &val_min - &val_max )) / (( &val_mode - mu ) * ( &val_max - &val_min ));

```

```

w = ( v * ( &val_max - mu )) / ( mu - &val_min );

call symput('mu',mu);
call symput('v',v);
call symput('w',w);
call symput('range',range);

run;
%put &mu &v &w;

data pert_&tableout;
call streaminit(&init);
%do i=1 %to &n;
  PERT_&var=RAND('BETA', &v, &w)*&range + &val_min; output;
%end;
run;

%PERT_STAT(&tableout,&var);

%MEND PERT;

%MACRO PERT_STAT(table,var);
proc univariate data=pert_&table;var PERT_&var;output out=pert_&var._stat n=nb_echantillons median=PERT_&var._median pctlpts=2.5 97.5
pctlpre=PERT_&var._p;run;
data pert_&var._stat;
set pert_&var._stat;
PERT_&var._median=round(PERT_&var._median,0.00001);
PERT_&var._p2_5=round(PERT_&var._p2_5,0.00001);
PERT_&var._p97_5=round(PERT_&var._p97_5,0.00001);
%MEND PERT_STAT;

```

```

%MACRO LISTING(num1,table);
proc print data=library.pert_final_stat&table noobs;
var PERT_histoicidnum_&num1._median PERT_histoicidnum_&num1._p2_5 PERT_histoicidnum_&num1._p97_5;
format PERT_histoicidnum_&num1._median PERT_histoicidnum_&num1._p2_5 PERT_histoicidnum_&num1._p97_5 5.2;
run;
ods rtf startpage=no;
proc print data=library.pert_final_stat&table noobs;
var PERT_histoicidnum_&num1._l10_median PERT_histoicidnum_&num1._l10_p2_5 PERT_histoicidnum_&num1._l10_p97_5;
format PERT_histoicidnum_&num1._l10_median PERT_histoicidnum_&num1._l10_p2_5 PERT_histoicidnum_&num1._l10_p97_5 5.2;
run;
proc print data=library.pert_final_stat&table noobs;
var PERT_histoicidnum_&num1._l20_median PERT_histoicidnum_&num1._l20_p2_5 PERT_histoicidnum_&num1._l20_p97_5;
format PERT_histoicidnum_&num1._l20_median PERT_histoicidnum_&num1._l20_p2_5 PERT_histoicidnum_&num1._l20_p97_5 5.2;
run;
proc print data=library.pert_final_stat&table noobs;
var PERT_histoicidnum_&num1._l40_median PERT_histoicidnum_&num1._l40_p2_5 PERT_histoicidnum_&num1._l40_p97_5;
format PERT_histoicidnum_&num1._l40_median PERT_histoicidnum_&num1._l40_p2_5 PERT_histoicidnum_&num1._l40_p97_5 5.2;
run;
proc print data=library.pert_final_stat&table noobs;
var PERT_histoicidnum_&num1._l60_median PERT_histoicidnum_&num1._l60_p2_5 PERT_histoicidnum_&num1._l60_p97_5;
format PERT_histoicidnum_&num1._l60_median PERT_histoicidnum_&num1._l60_p2_5 PERT_histoicidnum_&num1._l60_p97_5 5.2;
run;
ods rtf startpage=yes;
%MEND LISTING;

```

```

/*****
/**** ANALYSIS ****
/*****/

```

```

%PERT_GLOBAL(argentina,100000,123,37.8,34.3,41.3,456,98000,80000,120000);

```

```

%PERT_GLOBAL(belize,100000,132,49.4,38.4,60.4,465,3100,2800,3400);

```



```

%PERT_GLOBAL(bolivia,100000,213,22,20.5,23.6,546,16000,8500,24000);

%PERT_GLOBAL(Brazil,100000,231,20.3,19.5,21.0,564,595000,530000,660000);

%PERT_GLOBAL(Chile,100000,312,0.1,0.000001,0.2,645,39000,25000,61000);
proc univariate data=pert_final_chile;var PERT_histoincid;output out=pert_histoincid_stat n=nb_echantillons median=PERT_histoincid_median pctlpts=2.5
97.5 pctlpre=PERT_histoincid_p;run;
proc print noobs;run ;

%PERT_GLOBAL(Colombia,100000,321,25.1,24.1,26.0,654,150000,110000,190000);

%PERT_GLOBAL(Costa_Rica,100000,234,36.9,33.3,39.1,789,9800,8800,11000); /*for Costa-Rica, prev=mean prev(Honduras,Panama), iclow=min(iclow
honduras,iclow Panama),ichigh=max(ichigh honduras,ichigh Panama)*/

%PERT_GLOBAL(Ecuador,100000,243,22.6,19.0,26.3,798,52000,36000,99000);

%PERT_GLOBAL(El_Salvador,100000,324,43.6,33.3,60.6,879,25000,16000,45000);/*Same method as for Costa-Rica for prev, taking into account Honduras,
Panama and Guatemala*/

%PERT_GLOBAL(French_Guiana,100000,342,32.5,28.0,37.0,897,2900,1935,3390);
%PERT(100000,99,0.77,0.45,1.09,4,tbincid,tbincid);
%PERT(100000,98,2900,1935,3390,4,hivnum,hivnum);
data pert_final_guyane2;
merge pert_tbincid pert_hivnum;
PERT_tbincidnum=PERT_tbincid*PERT_hivnum/100;
run;
%PERT_STAT(final_guyane2,tbincidnum);/* result: 22 [14-30]*/

%PERT_GLOBAL(Guatemala,100000,423,57.2,53.8,60.6,978,58000,36000,130000);

```

```

%PERT_GLOBAL(Guyana,100000,432,47.0,33.0,61.0,987,7200,4300,12000);
%PERT_GLOBAL(Honduras,100000,111,38.8,38.4,39.1,222,26000,21000,33000);
%PERT_GLOBAL(Mexico,100000,333,22.8,21.8,
%PERT_GLOBAL(Nicaragua,100000,555,36.9,33.3,39.1,666,9600,6600,15000);/*Idem Costa-Rica for prev*/
%PERT_GLOBAL(Panama,100000,777,34.9,33.3,36.5,888,17000,12000,22000);
%PERT_GLOBAL(Paraguay,100000,778,17.5,15.9,19.1,889,13000,7400,24000);
%PERT_GLOBAL(Peru,100000,779,19.7,17.9,21.6,887,76000,36000,230000);
%PERT_GLOBAL(Suriname,100000,789,43.1,39.7,46.5,998,4000,3600,4400);
%PERT_GLOBAL(Uruguay,100000,667,10.2,9.9,10.6,553,13000,9800,19000);
%PERT_GLOBAL(Venezuela,100000,442,48.2,47.6,48.8,336,110000,74000,160000);
%PERT_GLOBAL(total,100000,999,32.19,31.96,32.41,991,1500000,1200000,1900000);

data library.PERT_final_global;
set library.PERT_final_stat;;
drop nb_echantillons;
run;

proc print noobs;run;

```
